# Supplementary material for: Network pharmacology to investigate the pharmacological mechanisms of muscone in Xingnaojing injections for the treatment of severe traumatic brain injury
Source: PeerJ journal article supplement (doi:10.7717/peerj.11696), 2021-07-20
Supplement: supporting_information_of_Fig1-Fig3.zip [file count.xls]

1	AKT1	88
2	CASP3	60
3	PTGS2	48
4	ESR1	46
5	AR	43
6	NOS3	39
7	MAPK14	38
8	RELA	37
9	BCL2L1	35
10	PPARG	33
11	CAV1	32
12	CNR1	32
13	NR3C1	32
14	PGR	30
15	GRM5	29
16	CYP3A4	28
17	JAK2	28
18	MDM2	28
19	HDAC1	26
20	ADRA1A	24
21	GSK3B	24
22	PARP1	24
23	VCAM1	24
24	CHRM1	23
25	CYP19A1	23
26	CYP1A1	23
27	KIT	23
28	OPRK1	22
29	SMAD3	22
30	CASP8	21
31	CTSB	21
32	GRM1	21
33	HDAC2	21
34	PDGFRB	21
35	GABBR1	20
36	JAK1	20
37	PTPN1	20
38	ENSG00000196689	19
39	HDAC6	19
40	HTR2B	19
41	NCOA1	19
42	NCOA2	19
43	NOS2	19
44	PRKCA	19
45	SLC6A4	19
46	TACR1	19
47	TLR9	19
48	ACHE	18
49	CCR5	18
50	CTSD	18
51	EDNRA	18
52	ELANE	18
53	HDAC3	18
54	HTR3A	18
55	PIK3CD	18
56	PPARA	18
57	PTAFR	18
58	BCL2	17
59	CHRM2	17
60	CNR2	17
61	CYP17A1	17
62	ESR2	17
63	HRH1	17
64	PIK3CB	17
65	S1PR1	17
66	CHEK1	16
67	GCGR	16
68	SIRT2	16
69	TACR3	16
70	APOA1	15
71	GSTP1	15
72	HDAC4	15
73	JAK3	15
74	MET	15
75	MME	15
76	SELE	15
77	ELN	14
78	HCRTR1	14
79	SLC6A3	14
80	TYK2	14
81	UGT2B7	14
82	ADORA3	13
83	CACNA1B	13
84	CHRM3	13
85	CTSL	13
86	HCRTR2	13
87	PLAU	13
88	PRKCD	13
89	ALOX5	12
90	CD38	12
91	GRIA2	12
92	HSD17B1	12
93	KLK3	12
94	MAOA	12
95	NLRP3	12
96	NR3C2	12
97	S1PR3	12
98	SHBG	12
99	VDR	12
100	BRD4	11
101	CAPN1	11
102	CASP7	11
103	CDC25A	11
104	LRRK2	11
105	MAOB	11
106	PDGFRA	11
107	PPP1CC	11
108	SLC2A4	11
109	BACE1	10
110	FAAH	10
111	FLT1	10
112	PIK3CG	10
113	SPHK2	10
114	SRD5A1	10
115	ADH1B	9
116	AKR1B1	9
117	CTSK	9
118	GSTM1	9
119	HMGCR	9
120	HSD11B1	9
121	HSF1	9
122	MTNR1A	9
123	PTGS1	9
124	CA9	8
125	CBR1	8
126	CTSC	8
127	GABRA1	8
128	HDAC11	8
129	HDAC8	8
130	CASP6	7
131	EPHX1	7
132	NR1I3	7
133	OCLN	7
134	SERPINA6	7
135	TSPO	7
136	ALOX15	6
137	CES1	6
138	CMA1	6
139	CTSS	6
140	FKBP1A	6
141	GSTM2	6
142	P2RX7	6
143	PRKCQ	6
144	PTGES	6
145	ACP5	5
146	CES2	5
147	FBN1	5
148	FLT4	5
149	PREP	5
150	TAAR1	5
151	TRPM8	5
152	HTR6	4
153	KIF11	4
154	TUBB1	4
155	TYR	4
156	CA2	3
157	CHRNA2	3
158	EPHX2	3
159	PABPC1	3
160	DYRK1B	2
161	FAP	2
162	KCNA5	2
163	PLA2G7	2
164	ACP1	1
165	CA4	1
166	CLK1	1
167	POLB	1
168	PRSS1	1
169	SIGMAR1	1
