# Supplementary material for: Network pharmacology to investigate the pharmacological mechanisms of muscone in Xingnaojing injections for the treatment of severe traumatic brain injury
Source: PeerJ journal article supplement (doi:10.7717/peerj.11696), 2021-07-20
Supplement: supporting_information_of_Fig1-Fig3.zip [file GO.xls]

ID	Description	GeneRatio	BgRatio	pvalue	p.adjust	qvalue	geneID	Count
GO:0017136	NAD-dependent histone deacetylase activity	8/172	15/17697	4.1054726655378e-13	1.15625475916336e-10	7.7269753099087e-11	HDAC3/HDAC6/HDAC2/HDAC1/HDAC8/HDAC11/HDAC4/SIRT2	8
GO:0034979	NAD-dependent protein deacetylase activity	8/172	16/17697	8.14330301753422e-13	1.15625475916336e-10	7.7269753099087e-11	HDAC3/HDAC6/HDAC2/HDAC1/HDAC8/HDAC11/HDAC4/SIRT2	8
GO:0031078	histone deacetylase activity (H3-K14 specific)	7/172	10/17697	8.48627346174943e-13	1.15625475916336e-10	7.7269753099087e-11	HDAC3/HDAC6/HDAC2/HDAC1/HDAC8/HDAC11/HDAC4	7
GO:0032041	NAD-dependent histone deacetylase activity (H3-K14 specific)	7/172	10/17697	8.48627346174943e-13	1.15625475916336e-10	7.7269753099087e-11	HDAC3/HDAC6/HDAC2/HDAC1/HDAC8/HDAC11/HDAC4	7
GO:0005496	steroid binding	13/172	95/17697	7.64381137616758e-12	8.33175440002266e-10	5.56791312874523e-10	ESR1/AR/PGR/NR3C2/ESR2/CYP3A4/CAV1/APOA1/HSD11B1/HSD17B1/SERPINA6/VDR/SHBG	13
GO:0019213	deacetylase activity	10/172	44/17697	1.07860622487847e-11	9.79733987597941e-10	6.54732901417456e-10	HDAC3/HDAC6/HDAC2/HDAC1/HDAC8/HDAC11/HDAC4/CES1/CES2/SIRT2	10
GO:0004713	protein tyrosine kinase activity	14/172	134/17697	4.89669346993952e-11	3.8124256301672e-09	2.54775329413394e-09	MET/DYRK1A/CLK1/DYRK1B/FLT1/PDGFRB/KIT/FLT4/PDGFRA/JAK3/JAK1/JAK2/TYK2/PRKCD	14
GO:0004407	histone deacetylase activity	8/172	28/17697	1.78082960623769e-10	1.21319016924943e-08	8.10746110208211e-09	HDAC3/HDAC6/HDAC2/HDAC1/HDAC8/HDAC11/HDAC4/SIRT2	8
GO:0033558	protein deacetylase activity	8/172	29/17697	2.43899602713895e-10	1.47694759421192e-08	9.87008918584886e-09	HDAC3/HDAC6/HDAC2/HDAC1/HDAC8/HDAC11/HDAC4/SIRT2	8
GO:0019902	phosphatase binding	15/172	185/17697	3.66340078366374e-10	1.99655342709674e-08	1.33424912752385e-08	BCL2/SMAD3/MET/SLC6A3/MAPK14/AKT1/PPARG/FLT4/CTSC/JAK3/JAK1/PTPN1/HMGCR/PPP1CC/PPARA	15
GO:0016811	hydrolase activity, acting on carbon-nitrogen (but not peptide) bonds, in linear amides	10/172	73/17697	2.11985226976548e-09	1.05029044274744e-07	7.01884100802734e-08	KLK3/HDAC3/HDAC6/HDAC2/HDAC1/HDAC8/HDAC11/HDAC4/FAAH/SIRT2	10
GO:0003707	steroid hormone receptor activity	9/172	56/17697	3.21134789608525e-09	1.45848716947205e-07	9.74672256180261e-08	ESR1/AR/PGR/NR3C2/ESR2/NR1I3/PPARG/VDR/PPARA	9
GO:0004175	endopeptidase activity	20/172	427/17697	6.62418029698748e-09	2.77706020142937e-07	1.85584322490499e-07	CASP3/CASP8/CASP7/KLK3/CASP6/BACE1/ELANE/CTSK/PREP/MME/CTSS/CMA1/FAP/CAPN1/CTSB/CTSD/CTSL/CTSC/PLAU/CASP9	20
GO:0019903	protein phosphatase binding	12/172	140/17697	1.19978528146619e-08	4.67059270285052e-07	3.12124592020527e-07	BCL2/MET/SLC6A3/MAPK14/AKT1/PPARG/FLT4/JAK3/JAK1/PTPN1/HMGCR/PPP1CC	12
GO:0004879	nuclear receptor activity	8/172	47/17697	1.53997759184762e-08	5.24554867223095e-07	3.5054753077584e-07	ESR1/AR/PGR/ESR2/NR1I3/PPARG/VDR/PPARA	8
GO:0098531	transcription factor activity, direct ligand regulated sequence-specific DNA binding	8/172	47/17697	1.53997759184762e-08	5.24554867223095e-07	3.5054753077584e-07	ESR1/AR/PGR/ESR2/NR1I3/PPARG/VDR/PPARA	8
GO:0004197	cysteine-type endopeptidase activity	11/172	116/17697	1.72585048487866e-08	5.53287361328746e-07	3.69748772611774e-07	CASP3/CASP8/CASP7/CASP6/CTSK/CTSS/CAPN1/CTSB/CTSL/CTSC/CASP9	11
GO:0016538	cyclin-dependent protein serine/threonine kinase regulator activity	8/172	49/17697	2.17238132537787e-08	6.57748790183855e-07	4.39557858819148e-07	CASP3/CCNB1/CCNB2/CCND1/CCND2/CCND3/CCNE1/CCNE2	8
GO:0042277	peptide binding	16/172	295/17697	3.13147252381732e-08	8.98238171305494e-07	6.00271187391021e-07	ACHE/GSTP1/APOA1/BACE1/PTGES/CACNA1B/HCRTR2/HCRTR1/PPARG/GRIA2/GCGR/MME/CMA1/GSTM1/GSTM2/OPRK1	16
GO:0033218	amide binding	17/172	356/17697	7.30955652652677e-08	1.99185415347854e-06	1.33110871483066e-06	ACHE/GSTP1/APOA1/BACE1/PTGES/SRD5A1/CACNA1B/HCRTR2/HCRTR1/PPARG/GRIA2/GCGR/MME/CMA1/GSTM1/GSTM2/OPRK1	17
GO:0097153	cysteine-type endopeptidase activity involved in apoptotic process	5/172	15/17697	2.27092467223001e-07	5.8935902207874e-06	3.93854604807811e-06	CASP3/CASP8/CASP7/CASP6/CASP9	5
GO:0004715	non-membrane spanning protein tyrosine kinase activity	7/172	46/17697	2.81958652528691e-07	6.98488480127895e-06	4.6678322380348e-06	DYRK1A/CLK1/JAK3/JAK1/JAK2/TYK2/PRKCD	7
GO:0016810	hydrolase activity, acting on carbon-nitrogen (but not peptide) bonds	10/172	123/17697	3.37229577166503e-07	7.99087476329322e-06	5.34011138213318e-06	KLK3/HDAC3/HDAC6/HDAC2/HDAC1/HDAC8/HDAC11/HDAC4/FAAH/SIRT2	10
GO:0042826	histone deacetylase binding	9/172	111/17697	1.35653698690306e-06	3.08046940775903e-05	2.05860437486166e-05	RELA/HDAC3/HDAC6/HDAC2/HDAC1/HDAC4/PARP1/SIRT2/CCND1	9
GO:0016303	1-phosphatidylinositol-3-kinase activity	4/172	10/17697	1.7289091513061e-06	3.7690219498473e-05	2.51874764779752e-05	PIK3CD/PIK3CB/PIK3CG/ATM	4
GO:0008234	cysteine-type peptidase activity	11/172	184/17697	1.87926863922426e-06	3.93923618606624e-05	2.63249776992548e-05	CASP3/CASP8/CASP7/CASP6/CTSK/CTSS/CAPN1/CTSB/CTSL/CTSC/CASP9	11
GO:0051427	hormone receptor binding	11/172	185/17697	1.9814398229044e-06	3.99957297586259e-05	2.67281941023362e-05	ESR1/NCOA2/SMAD3/NCOA1/PARP1/PPARG/JAK1/JAK2/TYK2/VDR/CCNE1	11
GO:0035004	phosphatidylinositol 3-kinase activity	4/172	11/17697	2.69625323571061e-06	5.0670965981458e-05	3.38622003468556e-05	PIK3CD/PIK3CB/PIK3CG/ATM	4
GO:0043295	glutathione binding	4/172	11/17697	2.69625323571061e-06	5.0670965981458e-05	3.38622003468556e-05	GSTP1/PTGES/GSTM1/GSTM2	4
GO:0004712	protein serine/threonine/tyrosine kinase activity	6/172	43/17697	3.49510294847041e-06	6.34943702305458e-05	4.24317761463425e-05	DYRK1A/CLK1/DYRK1B/MAPK14/AKT1/LRRK2	6
GO:1900750	oligopeptide binding	4/172	12/17697	4.0137166981709e-06	7.05637290484884e-05	4.7156060358816e-05	GSTP1/PTGES/GSTM1/GSTM2	4
GO:0004674	protein serine/threonine kinase activity	16/172	439/17697	6.20657104087559e-06	0.000105705663039912	7.06405782941762e-05	CHEK1/PRKCA/DYRK1A/CLK1/DYRK1B/BRD4/MAPK14/AKT1/GSK3B/LRRK2/PRKCQ/PRKCD/PIK3CG/ATM/ATR/CCND3	16
GO:0042562	hormone binding	8/172	102/17697	6.82474304532192e-06	0.000110232661657877	7.36658637056986e-05	ACHE/AR/HSD17B1/HCRTR2/HCRTR1/GCGR/VDR/SHBG	8
GO:0020037	heme binding	9/172	135/17697	6.87689999333545e-06	0.000110232661657877	7.36658637056986e-05	PTGS1/CYP3A4/CYP1A1/NOS3/CYP19A1/PTGS2/CYP17A1/NOS2/JAK2	9
GO:0051059	NF-kappaB binding	5/172	29/17697	8.04318209030822e-06	0.000125243835406228	8.36974737818539e-05	RELA/HDAC3/HDAC2/HDAC1/GSK3B	5
GO:0004089	carbonate dehydratase activity	4/172	15/17697	1.08184243656792e-05	0.000163778924424865	0.000109449556448099	CA2/CA1/CA4/CA9	4
GO:0047485	protein N-terminus binding	8/172	109/17697	1.1161675928146e-05	0.000164408469752421	0.000109870266604225	RELA/NCOA1/HDAC1/PARP1/SLC6A3/MDM2/PPP1CC/ATM	8
GO:0046906	tetrapyrrole binding	9/172	145/17697	1.22759535312887e-05	0.000176063017751378	0.000117658723596285	PTGS1/CYP3A4/CYP1A1/NOS3/CYP19A1/PTGS2/CYP17A1/NOS2/JAK2	9
GO:0051721	protein phosphatase 2A binding	5/172	32/17697	1.33211555928365e-05	0.000186154610207586	0.000124402694605166	BCL2/SLC6A3/AKT1/PTPN1/HMGCR	5
GO:0052742	phosphatidylinositol kinase activity	4/172	16/17697	1.43153249212265e-05	0.000195046302051711	0.000130344800598536	PIK3CD/PIK3CB/PIK3CG/ATM	4
GO:0035173	histone kinase activity	4/172	17/17697	1.85783082665332e-05	0.000246955561103917	0.000165034522727099	CHEK1/PRKCA/JAK2/CCNB1	4
GO:0001085	RNA polymerase II transcription factor binding	9/172	155/17697	2.09414512604688e-05	0.000268983908375914	0.000179755542825816	ESR1/AR/SMAD3/HDAC2/HDAC1/HDAC4/PPARG/GSK3B/PPARA	9
GO:0031072	heat shock protein binding	8/172	119/17697	2.12225835966317e-05	0.000268983908375914	0.000179755542825816	CYP1A1/HSF1/APOA1/HDAC6/HDAC2/HDAC8/APAF1/BAX	8
GO:0016705	oxidoreductase activity, acting on paired donors, with incorporation or reduction of molecular oxygen	9/172	159/17697	2.56361543487732e-05	0.000317538730001849	0.000212203574274534	PTGS1/CYP3A4/CYP1A1/NOS3/TYR/CYP19A1/PTGS2/CYP17A1/NOS2	9
GO:0004714	transmembrane receptor protein tyrosine kinase activity	6/172	62/17697	3.02574449397391e-05	0.000366451277603507	0.000244890665477187	MET/FLT1/PDGFRB/KIT/FLT4/PDGFRA	6
GO:0019207	kinase regulator activity	10/172	207/17697	3.56493662115538e-05	0.000422367490984713	0.000282258139798572	CASP3/GSTP1/GRM5/CCNB1/CCNB2/CCND1/CCND2/CCND3/CCNE1/CCNE2	10
GO:0005518	collagen binding	6/172	67/17697	4.7189392102503e-05	0.000535796222830503	0.000358059861128641	ACHE/SMAD3/CTSK/CTSS/CTSB/CTSL	6
GO:0030374	nuclear receptor transcription coactivator activity	6/172	67/17697	4.7189392102503e-05	0.000535796222830503	0.000358059861128641	NCOA2/NCOA1/NR1I3/PPARG/VDR/PPARA	6
GO:0004497	monooxygenase activity	7/172	99/17697	5.09208895891354e-05	0.000566364996450588	0.000378488244851576	CYP3A4/CYP1A1/NOS3/TYR/CYP19A1/CYP17A1/NOS2	7
GO:0070491	repressing transcription factor binding	6/172	71/17697	6.55870824247795e-05	0.000714899198430097	0.00047775011618892	RELA/HDAC2/HDAC1/HDAC4/PPARG/PPARA	6
GO:0019887	protein kinase regulator activity	9/172	180/17697	6.76367675637028e-05	0.00072278506514153	0.000483020053189704	CASP3/GRM5/CCNB1/CCNB2/CCND1/CCND2/CCND3/CCNE1/CCNE2	9
GO:0008528	G protein-coupled peptide receptor activity	8/172	146/17697	9.13334821611088e-05	0.000957245149573159	0.0006397041463106	HCRTR2/HCRTR1/TACR1/TACR3/GCGR/CCR5/SIGMAR1/OPRK1	8
GO:0016803	ether hydrolase activity	3/172	10/17697	0.000102968050103156	0.00098451907554772	0.000657930661785632	EPHX2/EPHX1/ALOX15	3
GO:0043176	amine binding	3/172	10/17697	0.000102968050103156	0.00098451907554772	0.000657930661785632	HTR3A/HTR2B/SLC6A4	3
GO:0051378	serotonin binding	3/172	10/17697	0.000102968050103156	0.00098451907554772	0.000657930661785632	HTR3A/HTR2B/SLC6A4	3
GO:0051400	BH domain binding	3/172	10/17697	0.000102968050103156	0.00098451907554772	0.000657930661785632	BCL2/BCL2L1/BAX	3
GO:0070513	death domain binding	3/172	10/17697	0.000102968050103156	0.00098451907554772	0.000657930661785632	BCL2/BCL2L1/BAX	3
GO:0019199	transmembrane receptor protein kinase activity	6/172	79/17697	0.000119398262382528	0.00109859708696944	0.000734166281200245	MET/FLT1/PDGFRB/KIT/FLT4/PDGFRA	6
GO:0001653	peptide receptor activity	8/172	152/17697	0.000120946468290214	0.00109859708696944	0.000734166281200245	HCRTR2/HCRTR1/TACR1/TACR3/GCGR/CCR5/SIGMAR1/OPRK1	8
GO:0035257	nuclear hormone receptor binding	8/172	152/17697	0.000120946468290214	0.00109859708696944	0.000734166281200245	ESR1/NCOA2/SMAD3/NCOA1/PARP1/PPARG/VDR/CCNE1	8
GO:0004364	glutathione transferase activity	4/172	27/17697	0.000126984743787248	0.00113453582564017	0.000758183284734908	GSTP1/PTGES/GSTM1/GSTM2	4
GO:0016801	hydrolase activity, acting on ether bonds	3/172	11/17697	0.000140569973928448	0.00121604183795244	0.000812651812518678	EPHX2/EPHX1/ALOX15	3
GO:0043560	insulin receptor substrate binding	3/172	11/17697	0.000140569973928448	0.00121604183795244	0.000812651812518678	JAK2/PRKCD/PIK3CB	3
GO:0030594	neurotransmitter receptor activity	7/172	117/17697	0.000146573226225001	0.00123222462827517	0.000823466386061246	HTR3A/GRM5/GRM1/HTR2B/GRIA2/HRH1/HTR6	7
GO:0050661	NADP binding	5/172	52/17697	0.000146962570344746	0.00123222462827517	0.000823466386061246	NOS3/SRD5A1/HSD17B1/NOS2/HMGCR	5
GO:0043621	protein self-association	5/172	56/17697	0.000209342050910901	0.00172865784464305	0.00115522088700433	ACHE/HSF1/DYRK1A/PPARG/CTSC	5
GO:0002020	protease binding	7/172	128/17697	0.000255530799554937	0.00207857142921553	0.00138905980590744	BCL2/CASP3/ELANE/SLC6A3/GSK3B/KIT/FAP	7
GO:0035258	steroid hormone receptor binding	6/172	92/17697	0.000276074390676038	0.00221265504291824	0.00147866469309457	ESR1/SMAD3/NCOA1/PARP1/PPARG/CCNE1	6
GO:0001103	RNA polymerase II repressing transcription factor binding	4/172	35/17697	0.000356597582499773	0.00281660409365763	0.00188226946674175	HDAC2/HDAC1/PPARG/PPARA	4
GO:0052689	carboxylic ester hydrolase activity	7/172	136/17697	0.000369781367421977	0.00287901207492825	0.00192397523500758	ACHE/CA2/CES1/CES2/CA1/PLA2G7/FAAH	7
GO:0019825	oxygen binding	4/172	36/17697	0.000398151426441303	0.00301378510292376	0.00201404084135513	CYP3A4/CYP1A1/CYP19A1/CYP17A1	4
GO:0043394	proteoglycan binding	4/172	36/17697	0.000398151426441303	0.00301378510292376	0.00201404084135513	CTSK/CTSS/CTSB/CTSL	4
GO:0004697	protein kinase C activity	3/172	16/17697	0.000460314191952997	0.00334494979485844	0.00223535032162438	PRKCA/PRKCQ/PRKCD	3
GO:0016307	phosphatidylinositol phosphate kinase activity	3/172	16/17697	0.000460314191952997	0.00334494979485844	0.00223535032162438	PIK3CD/PIK3CB/PIK3CG	3
GO:0016641	oxidoreductase activity, acting on the CH-NH2 group of donors, oxygen as acceptor	3/172	16/17697	0.000460314191952997	0.00334494979485844	0.00223535032162438	VCAM1/MAOA/MAOB	3
GO:0017171	serine hydrolase activity	8/172	186/17697	0.000476600126091385	0.00341772458841848	0.00228398398376204	ACHE/KLK3/ELANE/PREP/CMA1/FAP/CTSC/PLAU	8
GO:0008395	steroid hydroxylase activity	4/172	38/17697	0.000491448890023963	0.00345060241583883	0.00230595545317284	CYP3A4/CYP1A1/CYP19A1/CYP17A1	4
GO:0016829	lyase activity	8/172	187/17697	0.000493847685202622	0.00345060241583883	0.00230595545317284	CYP1A1/POLB/CA2/CA1/CA4/CYP17A1/CA9/CD38	8
GO:0005123	death receptor binding	3/172	17/17697	0.000554971881314381	0.00378074594145422	0.00252658251229968	CASP3/CASP8/BID	3
GO:0046965	retinoid X receptor binding	3/172	17/17697	0.000554971881314381	0.00378074594145422	0.00252658251229968	NCOA1/PPARG/VDR	3
GO:0051879	Hsp90 protein binding	4/172	41/17697	0.000659140892256637	0.0043808754424374	0.00292763477176889	CYP1A1/HSF1/HDAC6/HDAC8	4
GO:0099528	G protein-coupled neurotransmitter receptor activity	4/172	41/17697	0.000659140892256637	0.0043808754424374	0.00292763477176889	GRM1/HTR2B/HRH1/HTR6	4
GO:0005506	iron ion binding	7/172	152/17697	0.000719720530323599	0.00469120436747413	0.0031350202050141	CYP3A4/CYP1A1/ACP5/CYP19A1/ALOX5/CYP17A1/ALOX15	7
GO:0030331	estrogen receptor binding	4/172	42/17697	0.000723048012601517	0.00469120436747413	0.0031350202050141	ESR1/NCOA1/PARP1/PPARG	4
GO:0070405	ammonium ion binding	5/172	75/17697	0.00081550001187309	0.00522879419377452	0.00349427868864507	ACHE/HTR3A/SLC6A3/HTR2B/SLC6A4	5
GO:0044389	ubiquitin-like protein ligase binding	10/172	308/17697	0.000882633768037645	0.00559343492535484	0.00373795940931487	RELA/BCL2/CASP8/SMAD3/HDAC6/GSK3B/MDM2/JAK1/BID/CCNB1	10
GO:0016638	oxidoreductase activity, acting on the CH-NH2 group of donors	3/172	20/17697	0.000910673133430893	0.0057047914680441	0.00381237633595994	VCAM1/MAOA/MAOB	3
GO:0004252	serine-type endopeptidase activity	7/172	160/17697	0.000973032651331905	0.0059671668242843	0.00398771554070955	KLK3/ELANE/PREP/CMA1/FAP/CTSC/PLAU	7
GO:0001540	amyloid-beta binding	5/172	78/17697	0.000974454765800556	0.0059671668242843	0.00398771554070955	ACHE/APOA1/BACE1/CACNA1B/GRIA2	5
GO:0016616	oxidoreductase activity, acting on the CH-OH group of donors, NAD or NADP as acceptor	6/172	119/17697	0.00108346644788903	0.00654303871689367	0.00437255701795308	ADH1B/AKR1B1/HSD11B1/HSD17B1/HMGCR/CBR1	6
GO:0051117	ATPase binding	5/172	80/17697	0.00109250738208683	0.00654303871689367	0.00437255701795308	ESR1/AR/PGR/CAV1/BBC3	5
GO:1990841	promoter-specific chromatin binding	4/172	48/17697	0.00120137497043286	0.00711684085745554	0.00475601532917357	HSF1/HDAC2/HDAC1/HDAC4	4
GO:0008013	beta-catenin binding	5/172	82/17697	0.00122084472766731	0.00715441265138371	0.00478112366466203	ESR1/AR/SMAD3/HDAC6/GSK3B	5
GO:0001223	transcription coactivator binding	3/172	23/17697	0.00138479194257244	0.00802884690108492	0.00536548725789548	ESR1/RELA/PPARA	3
GO:0033613	activating transcription factor binding	5/172	85/17697	0.00143381381854735	0.00822556348535057	0.00549694826833665	RELA/SMAD3/HDAC1/HDAC4/PPARG	5
GO:0016614	oxidoreductase activity, acting on CH-OH group of donors	6/172	128/17697	0.00157654978498478	0.00895020450850737	0.00598120861408701	ADH1B/AKR1B1/HSD11B1/HSD17B1/HMGCR/CBR1	6
GO:0004601	peroxidase activity	4/172	52/17697	0.00162194093251622	0.00911296709506539	0.00608997897613254	PTGS1/GSTP1/PTGS2/GSTM2	4
GO:0072341	modified amino acid binding	5/172	89/17697	0.00175884442896419	0.00976040244212297	0.00652264460642114	GSTP1/PTGES/MME/GSTM1/GSTM2	5
GO:0004190	aspartic-type endopeptidase activity	3/172	25/17697	0.00177299053535812	0.00976040244212297	0.00652264460642114	CASP3/BACE1/CTSD	3
GO:0005126	cytokine receptor binding	9/172	286/17697	0.0019674129357043	0.0105705010662339	0.00706401423257739	CASP3/CASP8/SMAD3/TLR9/FKBP1A/JAK1/JAK2/TYK2/BID	9
GO:0042974	retinoic acid receptor binding	3/172	26/17697	0.00199003342181577	0.0105705010662339	0.00706401423257739	NCOA1/PPARG/VDR	3
GO:0070001	aspartic-type peptidase activity	3/172	26/17697	0.00199003342181577	0.0105705010662339	0.00706401423257739	CASP3/BACE1/CTSD	3
GO:0042165	neurotransmitter binding	4/172	55/17697	0.00199772772444421	0.0105705010662339	0.00706401423257739	ACHE/HTR3A/HTR2B/SLC6A4	4
GO:0008236	serine-type peptidase activity	7/172	182/17697	0.00204098765841984	0.0106955603253732	0.00714758835843384	KLK3/ELANE/PREP/CMA1/FAP/CTSC/PLAU	7
GO:0016684	oxidoreductase activity, acting on peroxide as acceptor	4/172	56/17697	0.00213529585317754	0.0109786437734128	0.00733676628797845	PTGS1/GSTP1/PTGS2/GSTM2	4
GO:0016836	hydro-lyase activity	4/172	56/17697	0.00213529585317754	0.0109786437734128	0.00733676628797845	CA2/CA1/CA4/CA9	4
GO:0031625	ubiquitin protein ligase binding	9/172	290/17697	0.00216122485703541	0.0110081079166757	0.00735645647352928	RELA/BCL2/CASP8/SMAD3/HDAC6/GSK3B/MDM2/JAK1/BID	9
GO:0001968	fibronectin binding	3/172	27/17697	0.00222291450656933	0.0110135309643662	0.00736008056720564	CTSK/CTSS/CTSL	3
GO:0008066	glutamate receptor activity	3/172	27/17697	0.00222291450656933	0.0110135309643662	0.00736008056720564	GRM5/GRM1/GRIA2	3
GO:0016702	oxidoreductase activity, acting on single donors with incorporation of molecular oxygen, incorporation of two atoms of oxygen	3/172	27/17697	0.00222291450656933	0.0110135309643662	0.00736008056720564	ALOX5/PTGS2/ALOX15	3
GO:0016765	transferase activity, transferring alkyl or aryl (other than methyl) groups	4/172	58/17697	0.00242978840122664	0.0119300421501669	0.00797256317519601	GSTP1/PTGES/GSTM1/GSTM2	4
GO:0016701	oxidoreductase activity, acting on single donors with incorporation of molecular oxygen	3/172	28/17697	0.0024720205627897	0.012029028631432	0.00803871348425974	ALOX5/PTGS2/ALOX15	3
GO:0008227	G protein-coupled amine receptor activity	4/172	59/17697	0.00258700866038582	0.0123677168413182	0.00826505075247916	HTR2B/TAAR1/HRH1/HTR6	4
GO:0097110	scaffold protein binding	4/172	59/17697	0.00258700866038582	0.0123677168413182	0.00826505075247916	CASP8/NOS3/KCNA5/MDM2	4
GO:0016712	oxidoreductase activity, acting on paired donors, with incorporation or reduction of molecular oxygen, reduced flavin or flavoprotein as one donor, and incorporation of one atom of oxygen	3/172	32/17697	0.00363788857103686	0.0172404284453486	0.0115213679229176	CYP3A4/CYP1A1/CYP19A1	3
GO:0002039	p53 binding	4/172	66/17697	0.00388724631288481	0.0182633555217433	0.0122049657373697	HDAC1/BRD4/GSK3B/MDM2	4
GO:0015378	sodium:chloride symporter activity	2/172	10/17697	0.00401511644244398	0.0187028928301878	0.0124986980574504	SLC6A3/SLC6A4	2
GO:0003713	transcription coactivator activity	9/172	319/17697	0.00406476381155828	0.018773697265248	0.0125460149759069	NCOA2/ESR2/NCOA1/DYRK1B/NR1I3/PPARG/VDR/PPARA/CCNE1	9
GO:0004993	G protein-coupled serotonin receptor activity	3/172	34/17697	0.00432710776580487	0.0196522811030304	0.0131331516400744	HTR2B/HRH1/HTR6	3
GO:0099589	serotonin receptor activity	3/172	34/17697	0.00432710776580487	0.0196522811030304	0.0131331516400744	HTR2B/HRH1/HTR6	3
GO:0016229	steroid dehydrogenase activity	3/172	35/17697	0.00469934309548971	0.0211664627028255	0.0141450431582378	HSD11B1/SRD5A1/HSD17B1	3
GO:0048407	platelet-derived growth factor binding	2/172	11/17697	0.00487612676878077	0.0216056023494758	0.0144385097304077	PDGFRB/PDGFRA	2
GO:0097493	structural molecule activity conferring elasticity	2/172	11/17697	0.00487612676878077	0.0216056023494758	0.0144385097304077	ELN/FBN1	2
GO:0016504	peptidase activator activity	3/172	38/17697	0.00592975732185876	0.0260622398420405	0.0174167744767668	CAV1/CTSC/APAF1	3
GO:0016835	carbon-oxygen lyase activity	4/172	75/17697	0.00612892576823656	0.026537042419738	0.0177340737368022	CA2/CA1/CA4/CA9	4
GO:0031490	chromatin DNA binding	5/172	119/17697	0.00613516944015961	0.026537042419738	0.0177340737368022	RELA/HSF1/SMAD3/HDAC2/HDAC1	5
GO:0016709	oxidoreductase activity, acting on paired donors, with incorporation or reduction of molecular oxygen, NAD(P)H as one donor, and incorporation of one atom of oxygen	3/172	39/17697	0.00637861255371783	0.0273406994109999	0.018271138573068	CYP1A1/NOS3/NOS2	3
GO:0043130	ubiquitin binding	4/172	76/17697	0.00642130188001466	0.0273406994109999	0.018271138573068	SMAD3/HDAC6/MDM2/SIRT2	4
GO:0015373	anion:sodium symporter activity	2/172	13/17697	0.00682757894586664	0.0286233117345948	0.0191282778564361	SLC6A3/SLC6A4	2
GO:0016653	oxidoreductase activity, acting on NAD(P)H, heme protein as acceptor	2/172	13/17697	0.00682757894586664	0.0286233117345948	0.0191282778564361	NOS3/NOS2	2
GO:0050662	coenzyme binding	8/172	291/17697	0.00769936642812565	0.0319528369011281	0.0213533202661329	NOS3/PARP1/SRD5A1/HSD17B1/NOS2/HMGCR/SIRT2/MAOB	8
GO:0030544	Hsp70 protein binding	3/172	42/17697	0.00784440139839702	0.0319528369011281	0.0213533202661329	CYP1A1/HDAC8/BAX	3
GO:0001162	RNA polymerase II intronic transcription regulatory region sequence-specific DNA binding	2/172	14/17697	0.00791492290211429	0.0319528369011281	0.0213533202661329	NCOA2/HSF1	2
GO:0045125	bioactive lipid receptor activity	2/172	14/17697	0.00791492290211429	0.0319528369011281	0.0213533202661329	S1PR1/SPHK2	2
GO:0050998	nitric-oxide synthase binding	2/172	14/17697	0.00791492290211429	0.0319528369011281	0.0213533202661329	CAV1/SLC6A4	2
GO:0001221	transcription cofactor binding	3/172	43/17697	0.00837339029093747	0.0335551302100068	0.0224240947419842	ESR1/RELA/PPARA	3
GO:0005161	platelet-derived growth factor receptor binding	2/172	15/17697	0.00907465113253425	0.0360998895418333	0.0241246968256385	PDGFRB/PDGFRA	2
GO:0048156	tau protein binding	3/172	45/17697	0.00949300967379252	0.0374905092189632	0.0250540148522671	HDAC6/DYRK1A/GSK3B	3
GO:0016209	antioxidant activity	4/172	86/17697	0.0098651299592941	0.0386798260993905	0.0258488070118573	PTGS1/GSTP1/PTGS2/GSTM2	4
GO:0032813	tumor necrosis factor receptor superfamily binding	3/172	46/17697	0.0100839524470571	0.0387336036485073	0.0258847452677615	CASP3/CASP8/BID	3
GO:0042805	actinin binding	3/172	46/17697	0.0100839524470571	0.0387336036485073	0.0258847452677615	RELA/KCNA5/PPARG	3
GO:0004708	MAP kinase kinase activity	2/172	16/17697	0.0103052706954744	0.0387336036485073	0.0258847452677615	MAPK14/LRRK2	2
GO:0010181	FMN binding	2/172	16/17697	0.0103052706954744	0.0387336036485073	0.0258847452677615	NOS3/NOS2	2
GO:0015377	cation:chloride symporter activity	2/172	16/17697	0.0103052706954744	0.0387336036485073	0.0258847452677615	SLC6A3/SLC6A4	2
GO:0070402	NADPH binding	2/172	16/17697	0.0103052706954744	0.0387336036485073	0.0258847452677615	SRD5A1/HMGCR	2
GO:0031406	carboxylic acid binding	6/172	193/17697	0.0115472686132684	0.0427357719112333	0.0285592990464253	SELE/NOS3/PPARG/NOS2/VDR/PPARA	6
GO:0001161	intronic transcription regulatory region sequence-specific DNA binding	2/172	17/17697	0.0116053105373624	0.0427357719112333	0.0285592990464253	NCOA2/HSF1	2
GO:0044213	intronic transcription regulatory region DNA binding	2/172	17/17697	0.0116053105373624	0.0427357719112333	0.0285592990464253	NCOA2/HSF1	2
GO:0051213	dioxygenase activity	4/172	91/17697	0.011963048949745	0.0435381081135945	0.0290954812309101	PTGS1/ALOX5/PTGS2/ALOX15	4
GO:0017046	peptide hormone binding	3/172	49/17697	0.0119829655358517	0.0435381081135945	0.0290954812309101	HCRTR2/HCRTR1/GCGR	3
GO:0008188	neuropeptide receptor activity	3/172	50/17697	0.0126584312810537	0.0456877155508231	0.0305320127099658	HCRTR2/TACR1/TACR3	3
GO:0005261	cation channel activity	8/172	319/17697	0.0129173264423413	0.0463154138886581	0.030951488566829	HTR3A/KCNA5/CNR1/CACNA1B/GRIA2/TRPV1/ABCC9/TRPM8	8
GO:0015267	channel activity	10/172	456/17697	0.0138547191862078	0.0493517774933546	0.0329806180834393	HTR3A/BCL2/KCNA5/CNR1/CACNA1B/GRIA2/TRPV1/ABCC9/TRPM8/BAX	10
GO:0022803	passive transmembrane transporter activity	10/172	457/17697	0.0140491398050607	0.0497193584010265	0.0332262636538004	HTR3A/BCL2/KCNA5/CNR1/CACNA1B/GRIA2/TRPV1/ABCC9/TRPM8/BAX	10
