# Supplementary material for: Network pharmacology to investigate the pharmacological mechanisms of muscone in Xingnaojing injections for the treatment of severe traumatic brain injury
Source: PeerJ journal article supplement (doi:10.7717/peerj.11696), 2021-07-20
Supplement: supporting_information_of_Fig1-Fig3.zip [file KEGG.xls]

Description	GeneRatio	p.adjust	Count
Neuroactive ligand-receptor interaction	32/161	2.88E-11	32
Calcium signaling pathway	22/161	4.52E-09	22
Apoptosis	18/161	1.34E-08	18
AGE-RAGE signaling pathway in diabetic complications	14/161	5.74E-07	14
Toxoplasmosis	14/161	1.80E-06	14
EGFR tyrosine kinase inhibitor resistance	12/161	1.80E-06	12
Prostate cancer	13/161	1.94E-06	13
Viral carcinogenesis	18/161	3.46E-06	18
Platinum drug resistance	11/161	4.86E-06	11
Serotonergic synapse	13/161	1.04E-05	13
Estrogen signaling pathway	14/161	1.19E-05	14
Chemical carcinogenesis	11/161	1.19E-05	11
Fluid shear stress and atherosclerosis	14/161	1.19E-05	14
Prolactin signaling pathway	10/161	1.92E-05	10
Insulin resistance	12/161	2.37E-05	12
PI3K-Akt signaling pathway	22/161	2.96E-05	22
Cholinergic synapse	12/161	3.24E-05	12
Metabolism of xenobiotics by cytochrome P450	10/161	3.24E-05	10
Measles	13/161	4.76E-05	13
Hepatitis B	14/161	4.76E-05	14
Sphingolipid signaling pathway	12/161	4.76E-05	12
Inflammatory mediator regulation of TRP channels	11/161	4.97E-05	11
Thyroid hormone signaling pathway	12/161	5.18E-05	12
TNF signaling pathway	11/161	0.000133265	11
Tuberculosis	14/161	0.000133265	14
Chronic myeloid leukemia	9/161	0.000174894	9
VEGF signaling pathway	8/161	0.00018199	8
Kaposi sarcoma-associated herpesvirus infection	14/161	0.000206762	14
Steroid hormone biosynthesis	8/161	0.000217505	8
C-type lectin receptor signaling pathway	10/161	0.000328858	10
Epstein-Barr virus infection	14/161	0.000390913	14
Amphetamine addiction	8/161	0.000488648	8
PD-L1 expression and PD-1 checkpoint pathway in cancer	9/161	0.000492346	9
Drug metabolism - cytochrome P450	8/161	0.000565675	8
Small cell lung cancer	9/161	0.000602798	9
Influenza A	12/161	0.001044334	12
Human cytomegalovirus infection	14/161	0.001044334	14
Phospholipase D signaling pathway	11/161	0.001134283	11
Focal adhesion	13/161	0.001166942	13
Proteoglycans in cancer	13/161	0.001382641	13
Osteoclast differentiation	10/161	0.001385712	10
Arachidonic acid metabolism	7/161	0.001412913	7
Cellular senescence	11/161	0.001554058	11
Hepatitis C	11/161	0.001554058	11
Nitrogen metabolism	4/161	0.001586534	4
Dopaminergic synapse	10/161	0.001586534	10
HIF-1 signaling pathway	9/161	0.001648653	9
JAK-STAT signaling pathway	11/161	0.001947393	11
Apoptosis - multiple species	5/161	0.001947393	5
Autophagy - animal	10/161	0.001968786	10
Central carbon metabolism in cancer	7/161	0.002242437	7
Ovarian steroidogenesis	6/161	0.002342848	6
Hepatocellular carcinoma	11/161	0.002435226	11
Melanoma	7/161	0.002516944	7
Breast cancer	10/161	0.003110278	10
Glioma	7/161	0.003110278	7
Endocrine resistance	8/161	0.003122674	8
Retrograde endocannabinoid signaling	10/161	0.003122674	10
Pancreatic cancer	7/161	0.003175706	7
African trypanosomiasis	5/161	0.003175706	5
Legionellosis	6/161	0.003645676	6
Chagas disease (American trypanosomiasis)	8/161	0.00375315	8
Drug metabolism - other enzymes	7/161	0.00375315	7
NOD-like receptor signaling pathway	11/161	0.00375315	11
Rap1 signaling pathway	12/161	0.003760596	12
Human immunodeficiency virus 1 infection	12/161	0.003840816	12
NF-kappa B signaling pathway	8/161	0.003840816	8
Toll-like receptor signaling pathway	8/161	0.003840816	8
Shigellosis	13/161	0.003840816	13
Alzheimer disease	17/161	0.003840816	17
Salmonella infection	12/161	0.003894033	12
FoxO signaling pathway	9/161	0.004104992	9
cAMP signaling pathway	12/161	0.004189373	12
Alcoholism	11/161	0.004189373	11
Necroptosis	10/161	0.004189373	10
Th17 cell differentiation	8/161	0.004219556	8
MicroRNAs in cancer	15/161	0.004233915	15
Colorectal cancer	7/161	0.005031746	7
GnRH secretion	6/161	0.005184124	6
Gap junction	7/161	0.005606418	7
Type II diabetes mellitus	5/161	0.006400462	5
Signaling pathways regulating pluripotency of stem cells	9/161	0.006629029	9
Fc epsilon RI signaling pathway	6/161	0.006665715	6
Non-small cell lung cancer	6/161	0.006665715	6
Ras signaling pathway	12/161	0.006714263	12
Th1 and Th2 cell differentiation	7/161	0.006733502	7
Adipocytokine signaling pathway	6/161	0.006934228	6
Neurotrophin signaling pathway	8/161	0.007164913	8
Cocaine addiction	5/161	0.007722719	5
Non-alcoholic fatty liver disease (NAFLD)	9/161	0.007981948	9
p53 signaling pathway	6/161	0.008817206	6
Platelet activation	8/161	0.008845599	8
Pertussis	6/161	0.01051315	6
Lysosome	8/161	0.01051315	8
Relaxin signaling pathway	8/161	0.010903818	8
Leishmaniasis	6/161	0.010903818	6
Human T-cell leukemia virus 1 infection	11/161	0.011097707	11
Chemokine signaling pathway	10/161	0.011344842	10
T cell receptor signaling pathway	7/161	0.011621274	7
Tyrosine metabolism	4/161	0.012124399	4
Regulation of lipolysis in adipocytes	5/161	0.012171061	5
Transcriptional misregulation in cancer	10/161	0.012171061	10
Amyotrophic lateral sclerosis (ALS)	5/161	0.012891933	5
Aldosterone-regulated sodium reabsorption	4/161	0.014257309	4
Human papillomavirus infection	14/161	0.014974679	14
Longevity regulating pathway - multiple species	5/161	0.017875867	5
Growth hormone synthesis, secretion and action	7/161	0.022122291	7
AMPK signaling pathway	7/161	0.022894147	7
Renin-angiotensin system	3/161	0.023123088	3
Fc gamma R-mediated phagocytosis	6/161	0.02331843	6
Long-term potentiation	5/161	0.02331843	5
Acute myeloid leukemia	5/161	0.02331843	5
IL-17 signaling pathway	6/161	0.024116982	6
Cell cycle	7/161	0.025693095	7
Choline metabolism in cancer	6/161	0.028710931	6
Progesterone-mediated oocyte maturation	6/161	0.02981257	6
MAPK signaling pathway	12/161	0.030740486	12
Yersinia infection	7/161	0.031556782	7
Amoebiasis	6/161	0.033266418	6
Arginine and proline metabolism	4/161	0.034985415	4
Malaria	4/161	0.034985415	4
Apelin signaling pathway	7/161	0.03928725	7
Insulin signaling pathway	7/161	0.03928725	7
B cell receptor signaling pathway	5/161	0.046925863	5
Taste transduction	5/161	0.048759609	5
Leukocyte transendothelial migration	6/161	0.049354844	6
