# Supplementary material for: Network pharmacology to investigate the pharmacological mechanisms of muscone in Xingnaojing injections for the treatment of severe traumatic brain injury
Source: PeerJ journal article supplement (doi:10.7717/peerj.11696), 2021-07-20
Supplement: supporting_information_of_Fig1-Fig3.zip [file network.xlsx]

## Sheet: Sheet1
Node1	Node2	Net
brain-injury	CHRM2	disease
brain-injury	GABRA1	disease
brain-injury	PRSS1	disease
brain-injury	CHRM3	disease
brain-injury	CHRM1	disease
brain-injury	ACHE	disease
brain-injury	ADRA1A	disease
brain-injury	ESR1	disease
brain-injury	AR	disease
brain-injury	PGR	disease
brain-injury	PTGS1	disease
brain-injury	CHRNA2	disease
brain-injury	NCOA2	disease
brain-injury	ADH1B	disease
brain-injury	NR3C1	disease
Isoborneol	CHRM2	target
Borneolum-Syntheticum	Isoborneol	mol
Isoborneol	GABRA1	target
Isoborneol	PRSS1	target
Isoborneol	CHRM3	target
Isoborneol	CHRM1	target
Isoborneol	ACHE	target
Isoborneol	ADRA1A	target
Isoborneol	ESR1	target
Isoborneol	AR	target
Isoborneol	PGR	target
Caryophyllene	PTGS1	target
Borneolum-Syntheticum	Caryophyllene	mol
Caryophyllene	CHRM3	target
Caryophyllene	CHRM1	target
Caryophyllene	ESR1	target
Caryophyllene	ACHE	target
Caryophyllene	CHRM2	target
Caryophyllene	CHRNA2	target
Caryophyllene	GABRA1	target
Caryophyllene	NCOA2	target
Caryophyllene	ADRA1A	target
Caryophyllene	PRSS1	target
1,8-cineole	ACHE	target
Borneolum-Syntheticum	1,8-cineole	mol
1,8-cineole	GABRA1	target
1,8-cineole	PRSS1	target
1,8-cineole	ADH1B	target
1,8-cineole	CHRNA2	target
Borneol	CHRM2	target
Borneolum-Syntheticum	Borneol	mol
Borneol	GABRA1	target
Borneol	PRSS1	target
Borneol	PTGS1	target
Borneol	ESR1	target
Borneol	ACHE	target
Borneol	NCOA2	target
camphor	ESR1	target
Borneolum-Syntheticum	camphor	mol
camphor	AR	target
camphor	NR3C1	target
camphor	ACHE	target
camphor	GABRA1	target
camphor	PRSS1	target
β-Elemene	ACHE	target
Borneolum-Syntheticum	β-Elemene	mol
β-Elemene	CHRM2	target
β-Elemene	GABRA1	target
β-Elemene	PRSS1	target
β-Elemene	PTGS1	target
β-Elemene	CHRM3	target
β-Elemene	CHRM1	target
β-Elemene	ADRA1A	target
β-Elemene	NCOA2	target
β-Elemene	ESR1	target
Erythrodiol	ESR1	target
Borneolum-Syntheticum	Erythrodiol	mol
Erythrodiol	AR	target
Erythrodiol	NR3C1	target
dipterocarpol	AR	target
Borneolum-Syntheticum	dipterocarpol	mol
dipterocarpol	NR3C1	target
brain-injury	NR3C2	disease
brain-injury	HTR3A	disease
brain-injury	ESR2	disease
brain-injury	CHEK1	disease
brain-injury	RELA	disease
brain-injury	BCL2	disease
brain-injury	CASP3	disease
brain-injury	CASP8	disease
brain-injury	PRKCA	disease
brain-injury	CYP3A4	disease
brain-injury	CAV1	disease
brain-injury	CASP7	disease
brain-injury	CYP1A1	disease
brain-injury	SELE	disease
brain-injury	VCAM1	disease
brain-injury	NOS3	disease
brain-injury	LITAF	disease
brain-injury	GABBR1	disease
brain-injury	TYR	disease
brain-injury	GSTP1	disease
brain-injury	SLC2A4	disease
brain-injury	HSF1	disease
brain-injury	AKR1B1	disease
brain-injury	KLK3	disease
brain-injury	APOA1	disease
brain-injury	SMAD3	disease
brain-injury	ELN	disease
brain-injury	FBN1	disease
brain-injury	NCOA1	disease
brain-injury	OCLN	disease
brain-injury	ACP5	disease
brain-injury	CASP6	disease
cholesterol	ESR1	target
Moschus	cholesterol	mol
cholesterol	AR	target
cholesterol	PGR	target
cholesterol	NR3C2	target
cholesterol	NR3C1	target
cholesterol	PRSS1	target
cholesterol	NCOA2	target
n-nornuciferine	PTGS1	target
Moschus	n-nornuciferine	mol
n-nornuciferine	CHRM3	target
n-nornuciferine	CHRM1	target
n-nornuciferine	ESR1	target
n-nornuciferine	AR	target
n-nornuciferine	HTR3A	target
n-nornuciferine	ACHE	target
n-nornuciferine	ADRA1A	target
n-nornuciferine	ESR2	target
n-nornuciferine	GABRA1	target
n-nornuciferine	CHEK1	target
17-beta-estradiol	CHRM3	target
Moschus	17-beta-estradiol	mol
17-beta-estradiol	CHRM1	target
17-beta-estradiol	ESR1	target
17-beta-estradiol	AR	target
17-beta-estradiol	ACHE	target
17-beta-estradiol	ADRA1A	target
17-beta-estradiol	CHRM2	target
17-beta-estradiol	ESR2	target
17-beta-estradiol	RELA	target
17-beta-estradiol	BCL2	target
17-beta-estradiol	CASP3	target
17-beta-estradiol	CASP8	target
17-beta-estradiol	PRKCA	target
17-beta-estradiol	CYP3A4	target
17-beta-estradiol	CAV1	target
17-beta-estradiol	CASP7	target
17-beta-estradiol	CYP1A1	target
17-beta-estradiol	SELE	target
17-beta-estradiol	VCAM1	target
17-beta-estradiol	NOS3	target
17-beta-estradiol	LITAF	target
17-beta-estradiol	GABBR1	target
17-beta-estradiol	TYR	target
17-beta-estradiol	GSTP1	target
17-beta-estradiol	SLC2A4	target
17-beta-estradiol	HSF1	target
17-beta-estradiol	PGR	target
17-beta-estradiol	AKR1B1	target
17-beta-estradiol	KLK3	target
17-beta-estradiol	APOA1	target
17-beta-estradiol	SMAD3	target
17-beta-estradiol	ELN	target
17-beta-estradiol	FBN1	target
17-beta-estradiol	NCOA1	target
17-beta-estradiol	OCLN	target
17-beta-estradiol	ACP5	target
17-beta-estradiol	CASP6	target
cholesteryl ferulate	EDNRA	target
cholesteryl ferulate	POLB	target
cholesteryl ferulate	BACE1	target
cholesteryl ferulate	MET	target
cholesteryl ferulate	ELANE	target
cholesteryl ferulate	ACP1	target
cholesteryl ferulate	HDAC3	target
cholesteryl ferulate	HDAC6	target
cholesteryl ferulate	HDAC2	target
cholesteryl ferulate	HDAC1	target
cholesteryl ferulate	HDAC8	target
cholesteryl ferulate	HDAC11	target
cholesteryl ferulate	HDAC4	target
cholesteryl ferulate	DYRK1A	target
cholesteryl ferulate	CLK1	target
cholesteryl ferulate	PRKCA	target
cholesteryl ferulate	DYRK1B	target
Moschus	cholesteryl ferulate	mol
Moschus	Muscone	mol
Muscone	CYP19A1	target
Muscone	CA2	target
Muscone	NR1I3	target
Muscone	CES1	target
Muscone	CES2	target
Muscone	CA1	target
Muscone	CA4	target
Muscone	AR	target
Muscone	P2RX7	target
Muscone	PARP1	target
Muscone	EPHX2	target
Muscone	EPHX1	target
Muscone	MTNR1A	target
Muscone	ALOX5	target
Muscone	PTGS1	target
Muscone	PTGS2	target
Muscone	BRD4	target
Muscone	HSD11B1	target
Muscone	TSPO	target
Muscone	CTSK	target
Muscone	S1PR3	target
Muscone	PTGES	target
Muscone	SRD5A1	target
Muscone	GRM5	target
Muscone	GRM1	target
Muscone	KCNA5	target
Muscone	CNR2	target
Muscone	SLC6A3	target
Muscone	CYP17A1	target
Muscone	CNR1	target
Muscone	MAPK14	target
Muscone	CACNA1B	target
Muscone	HSD17B1	target
Muscone	S1PR1	target
Muscone	HTR2B	target
Muscone	SPHK2	target
Muscone	TUBB1	target
Muscone	PREP	target
Muscone	AKT1	target
Muscone	HCRTR2	target
Muscone	HCRTR1	target
brain-injury	PPARG	disease
brain-injury	GSK3B	disease
brain-injury	GRIA2	disease
Curcumae-Radix	caryophyllene	mol
beta-sitosterol	ESR1	target
Curcumae-Radix	beta-sitosterol	mol
beta-sitosterol	AR	target
beta-sitosterol	PGR	target
beta-sitosterol	NR3C1	target
beta-sitosterol	NCOA2	target
beta-sitosterol	PTGS1	target
beta-sitosterol	PPARG	target
beta-sitosterol	ESR2	target
beta-sitosterol	GSK3B	target
beta-sitosterol	CHEK1	target
beta-sitosterol	PRSS1	target
beta-sitosterol	CHRM3	target
beta-sitosterol	CHRM1	target
beta-sitosterol	ADRA1A	target
beta-sitosterol	CHRM2	target
beta-sitosterol	CHRNA2	target
beta-sitosterol	GABRA1	target
beta-sitosterol	ACHE	target
sitosterol	ESR1	target
Curcumae-Radix	sitosterol	mol
sitosterol	AR	target
sitosterol	PGR	target
sitosterol	NR3C1	target
sitosterol	NCOA2	target
sitosterol	NR3C2	target
difurocumenone	PTGS1	target
Curcumae-Radix	difurocumenone	mol
difurocumenone	ESR1	target
difurocumenone	AR	target
difurocumenone	PPARG	target
difurocumenone	ESR2	target
difurocumenone	GSK3B	target
difurocumenone	NCOA2	target
Germacron	ESR1	target
Curcumae-Radix	Germacron	mol
Germacron	AR	target
Germacron	NR3C1	target
Germacron	ACHE	target
Germacron	GABRA1	target
Germacron	PTGS1	target
Germacron	CHRM1	target
Germacron	PRSS1	target
Germacron	GRIA2	target
curcumin	ESR1	target
Curcumae-Radix	curcumin	mol
curcumin	AR	target
curcumin	PPARG	target
curcumin	ESR2	target
curcumin	GSK3B	target
curcumin	CHEK1	target
curcumin	PRSS1	target
Curcumae-Radix	1,7-Diphenyl-3-acetoxy-6(E)-hepten	mol
1,7-Diphenyl-3-acetoxy-6(E)-hepten	BCL2L1	target
1,7-Diphenyl-3-acetoxy-6(E)-hepten	BCL2	target
1,7-Diphenyl-3-acetoxy-6(E)-hepten	PLA2G7	target
1,7-Diphenyl-3-acetoxy-6(E)-hepten	FLT1	target
1,7-Diphenyl-3-acetoxy-6(E)-hepten	PDGFRB	target
1,7-Diphenyl-3-acetoxy-6(E)-hepten	TAAR1	target
1,7-Diphenyl-3-acetoxy-6(E)-hepten	TACR1	target
1,7-Diphenyl-3-acetoxy-6(E)-hepten	TACR3	target
1,7-Diphenyl-3-acetoxy-6(E)-hepten	HRH1	target
1,7-Diphenyl-3-acetoxy-6(E)-hepten	TMIGD3	target
1,7-Diphenyl-3-acetoxy-6(E)-hepten	TLR9	target
1,7-Diphenyl-3-acetoxy-6(E)-hepten	FKBP1A	target
1,7-Diphenyl-3-acetoxy-6(E)-hepten	PTAFR	target
1,7-Diphenyl-3-acetoxy-6(E)-hepten	KIT	target
1,7-Diphenyl-3-acetoxy-6(E)-hepten	FLT4	target
1,7-Diphenyl-3-acetoxy-6(E)-hepten	GCGR	target
1,7-Diphenyl-3-acetoxy-6(E)-hepten	PDGFRA	target
Curcumae-Radix	4,5-Epoxy-12-acetoxy-7a,11a-dihydrogermacradien-8-one	mol
4,5-Epoxy-12-acetoxy-7a,11a-dihydrogermacradien-8-one	KIF11	target
4,5-Epoxy-12-acetoxy-7a,11a-dihydrogermacradien-8-one	MME	target
4,5-Epoxy-12-acetoxy-7a,11a-dihydrogermacradien-8-one	CTSK	target
4,5-Epoxy-12-acetoxy-7a,11a-dihydrogermacradien-8-one	CTSS	target
4,5-Epoxy-12-acetoxy-7a,11a-dihydrogermacradien-8-one	HTR2B	target
4,5-Epoxy-12-acetoxy-7a,11a-dihydrogermacradien-8-one	KCNA5	target
4,5-Epoxy-12-acetoxy-7a,11a-dihydrogermacradien-8-one	CMA1	target
4,5-Epoxy-12-acetoxy-7a,11a-dihydrogermacradien-8-one	PREP	target
4,5-Epoxy-12-acetoxy-7a,11a-dihydrogermacradien-8-one	FAP	target
4,5-Epoxy-12-acetoxy-7a,11a-dihydrogermacradien-8-one	CAPN1	target
4,5-Epoxy-12-acetoxy-7a,11a-dihydrogermacradien-8-one	CTSB	target
4,5-Epoxy-12-acetoxy-7a,11a-dihydrogermacradien-8-one	HCRTR2	target
Curcumae-Radix	curdione	mol
curdione	CYP19A1	target
curdione	PTGS1	target
curdione	CTSD	target
curdione	TRPV1	target
curdione	CCR5	target
curdione	FAAH	target
curdione	MTNR1A	target
curdione	MTNR1B	target
curdione	CTSK	target
curdione	CTSS	target
curdione	CTSB	target
curdione	AR	target
curdione	CTSL	target
Curcumae-Radix	curzerenone	mol
curzerenone	SLC6A4	target
curzerenone	SLC6A3	target
curzerenone	PTGS2	target
curzerenone	PABPC1	target
curzerenone	HSD17B2	target
curzerenone	MDM2	target
curzerenone	CTSK	target
curzerenone	CTSL	target
curzerenone	CTSB	target
curzerenone	EPHX1	target
curzerenone	NLRP3	target
curzerenone	PTGS1	target
curzerenone	HTR6	target
curzerenone	HCRTR1	target
curzerenone	NOS2	target
curzerenone	MTNR1A	target
curzerenone	AR	target
curzerenone	CYP17A1	target
curzerenone	CTSC	target
Curcumae-Radix	Oxycurcumenol	mol
Oxycurcumenol	CYP19A1	target
Oxycurcumenol	FKBP1A	target
Oxycurcumenol	TAAR1	target
Oxycurcumenol	LRRK2	target
Oxycurcumenol	CYP17A1	target
Oxycurcumenol	ABCC9	target
Oxycurcumenol	JAK3	target
Oxycurcumenol	JAK1	target
Oxycurcumenol	JAK2	target
Oxycurcumenol	TYK2	target
Oxycurcumenol	SERPINA6	target
Oxycurcumenol	AR	target
brain-injury	PLAU	disease
brain-injury	GSTM1	disease
brain-injury	GSTM2	disease
Gardeniae-Fructus	beta-sitosterol	mol
Stigmasterol	ESR1	target
Gardeniae-Fructus	Stigmasterol	mol
Stigmasterol	AR	target
Stigmasterol	PGR	target
Stigmasterol	NR3C2	target
Stigmasterol	NR3C1	target
Stigmasterol	NCOA2	target
Stigmasterol	ACHE	target
Stigmasterol	PRSS1	target
Stigmasterol	NCOA1	target
Stigmasterol	PTGS1	target
Stigmasterol	PPARG	target
Stigmasterol	AKR1B1	target
Stigmasterol	PLAU	target
Stigmasterol	CHRM3	target
Stigmasterol	CHRM1	target
Stigmasterol	ADRA1A	target
Stigmasterol	CHRM2	target
Stigmasterol	GABRA1	target
Nonacosane	AR	target
Gardeniae-Fructus	Nonacosane	mol
Nonacosane	NR3C1	target
Mandenol	PTGS1	target
Gardeniae-Fructus	Mandenol	mol
Mandenol	PPARG	target
Mandenol	ACHE	target
Mandenol	NCOA2	target
(4aS,6aR,6aS,6bR,8aR,10R,12aR,14bS)-10-hydroxy-2,2,6a,6b,9,9,12a-heptamethyl-1,3,4,5,6,6a,7,8,8a,10,11,12,13,14b-tetradecahydropicene-4a-carboxylic acid	AR	target
Gardeniae-Fructus	(4aS,6aR,6aS,6bR,8aR,10R,12aR,14bS)-10-hydroxy-2,2,6a,6b,9,9,12a-heptamethyl-1,3,4,5,6,6a,7,8,8a,10,11,12,13,14b-tetradecahydropicene-4a-carboxylic acid	mol
(4aS,6aR,6aS,6bR,8aR,10R,12aR,14bS)-10-hydroxy-2,2,6a,6b,9,9,12a-heptamethyl-1,3,4,5,6,6a,7,8,8a,10,11,12,13,14b-tetradecahydropicene-4a-carboxylic acid	NR3C1	target
(4aS,6aR,6aS,6bR,8aR,10R,12aR,14bS)-10-hydroxy-2,2,6a,6b,9,9,12a-heptamethyl-1,3,4,5,6,6a,7,8,8a,10,11,12,13,14b-tetradecahydropicene-4a-carboxylic acid	ESR1	target
Ammidin	CHRM1	target
Gardeniae-Fructus	Ammidin	mol
Ammidin	ESR1	target
Ammidin	AR	target
Ammidin	PPARG	target
Ammidin	ESR2	target
Ammidin	GABRA1	target
Ammidin	GSK3B	target
Ammidin	CHEK1	target
isoimperatorin	ESR1	target
Gardeniae-Fructus	isoimperatorin	mol
Ethyl oleate (NF)	PPARG	target
Gardeniae-Fructus	Ethyl oleate (NF)	mol
Ethyl oleate (NF)	ACHE	target
Ethyl oleate (NF)	NCOA2	target
GARDENOSIDE	ESR1	target
Gardeniae-Fructus	GARDENOSIDE	mol
GARDENOSIDE	AR	target
geniposide	ESR1	target
Gardeniae-Fructus	geniposide	mol
geniposide	AR	target
geniposide	BCL2	target
geniposide	GSTM1	target
geniposide	GSTM2	target
Gardeniae-Fructus	4,8,12,16-tetramethylheptadecan-4-olide	mol
4,8,12,16-tetramethylheptadecan-4-olide	VDR	target
4,8,12,16-tetramethylheptadecan-4-olide	PTPN1	target
4,8,12,16-tetramethylheptadecan-4-olide	HMGCR	target
4,8,12,16-tetramethylheptadecan-4-olide	CDC25A	target
4,8,12,16-tetramethylheptadecan-4-olide	PRKCA	target
4,8,12,16-tetramethylheptadecan-4-olide	ACHE	target
4,8,12,16-tetramethylheptadecan-4-olide	HSD11B1	target
4,8,12,16-tetramethylheptadecan-4-olide	OPRK1	target
4,8,12,16-tetramethylheptadecan-4-olide	CYP19A1	target
4,8,12,16-tetramethylheptadecan-4-olide	SIRT2	target
4,8,12,16-tetramethylheptadecan-4-olide	PPP1CC	target
4,8,12,16-tetramethylheptadecan-4-olide	CA2	target
4,8,12,16-tetramethylheptadecan-4-olide	CA9	target
4,8,12,16-tetramethylheptadecan-4-olide	CA1	target
4,8,12,16-tetramethylheptadecan-4-olide	UGT2B7	target
4,8,12,16-tetramethylheptadecan-4-olide	PRKCQ	target
4,8,12,16-tetramethylheptadecan-4-olide	TRPM8	target
4,8,12,16-tetramethylheptadecan-4-olide	PRKCD	target
Gardeniae-Fructus	Hentriacontan	mol
Hentriacontan	SHBG	target
isoimperatorin	BACE1	target
isoimperatorin	SRD5A1	target
isoimperatorin	CA9	target
isoimperatorin	KCNA5	target
isoimperatorin	MAOA	target
isoimperatorin	ALOX5	target
isoimperatorin	MAOB	target
isoimperatorin	ALOX15	target
isoimperatorin	CD38	target
isoimperatorin	OPRK1	target
isoimperatorin	CBR1	target
isoimperatorin	PIK3CD	target
isoimperatorin	PIK3CB	target
isoimperatorin	PIK3CG	target
Gardeniae-Fructus	Supraene	mol
Supraene	PPARA	target
Supraene	CNR2	target

## Sheet: Sheet2
Node1	Node2	Net
Isoborneol	GABRA1	target
Isoborneol	PRSS1	target
Isoborneol	CHRM3	target
Isoborneol	CHRM1	target
Isoborneol	ACHE	target
Isoborneol	ADRA1A	target
Isoborneol	ESR1	target
Isoborneol	AR	target
Isoborneol	PGR	target
Caryophyllene	PTGS1	target
Caryophyllene	CHRM3	target
Caryophyllene	CHRM1	target
Caryophyllene	ESR1	target
Caryophyllene	ACHE	target
Caryophyllene	CHRM2	target
Caryophyllene	CHRNA2	target
Caryophyllene	GABRA1	target
Caryophyllene	NCOA2	target
Caryophyllene	ADRA1A	target
Caryophyllene	PRSS1	target
1,8-cineole	ACHE	target
1,8-cineole	GABRA1	target
1,8-cineole	PRSS1	target
1,8-cineole	ADH1B	target
1,8-cineole	CHRNA2	target
Borneol	CHRM2	target
Borneol	GABRA1	target
Borneol	PRSS1	target
Borneol	PTGS1	target
Borneol	ESR1	target
Borneol	ACHE	target
Borneol	NCOA2	target
camphor	ESR1	target
camphor	AR	target
camphor	NR3C1	target
camphor	ACHE	target
camphor	GABRA1	target
camphor	PRSS1	target
β-Elemene	ACHE	target
β-Elemene	CHRM2	target
β-Elemene	GABRA1	target
β-Elemene	PRSS1	target
β-Elemene	PTGS1	target
β-Elemene	CHRM3	target
β-Elemene	CHRM1	target
β-Elemene	ADRA1A	target
β-Elemene	NCOA2	target
β-Elemene	ESR1	target
Erythrodiol	ESR1	target
Erythrodiol	AR	target
Erythrodiol	NR3C1	target
dipterocarpol	AR	target
dipterocarpol	NR3C1	target
cholesterol	ESR1	target
cholesterol	AR	target
cholesterol	PGR	target
cholesterol	NR3C2	target
cholesterol	NR3C1	target
cholesterol	PRSS1	target
cholesterol	NCOA2	target
n-nornuciferine	PTGS1	target
n-nornuciferine	CHRM3	target
n-nornuciferine	CHRM1	target
n-nornuciferine	ESR1	target
n-nornuciferine	AR	target
n-nornuciferine	HTR3A	target
n-nornuciferine	ACHE	target
n-nornuciferine	ADRA1A	target
n-nornuciferine	ESR2	target
n-nornuciferine	GABRA1	target
n-nornuciferine	CHEK1	target
17-beta-estradiol	CHRM3	target
17-beta-estradiol	CHRM1	target
17-beta-estradiol	ESR1	target
17-beta-estradiol	AR	target
17-beta-estradiol	ACHE	target
17-beta-estradiol	ADRA1A	target
17-beta-estradiol	CHRM2	target
17-beta-estradiol	ESR2	target
17-beta-estradiol	RELA	target
17-beta-estradiol	BCL2	target
17-beta-estradiol	CASP3	target
17-beta-estradiol	CASP8	target
17-beta-estradiol	PRKCA	target
17-beta-estradiol	CYP3A4	target
17-beta-estradiol	CAV1	target
17-beta-estradiol	CASP7	target
17-beta-estradiol	CYP1A1	target
17-beta-estradiol	SELE	target
17-beta-estradiol	VCAM1	target
17-beta-estradiol	NOS3	target
17-beta-estradiol	LITAF	target
17-beta-estradiol	GABBR1	target
17-beta-estradiol	TYR	target
17-beta-estradiol	GSTP1	target
17-beta-estradiol	SLC2A4	target
17-beta-estradiol	HSF1	target
17-beta-estradiol	PGR	target
17-beta-estradiol	AKR1B1	target
17-beta-estradiol	KLK3	target
17-beta-estradiol	APOA1	target
17-beta-estradiol	SMAD3	target
17-beta-estradiol	ELN	target
17-beta-estradiol	FBN1	target
17-beta-estradiol	NCOA1	target
17-beta-estradiol	OCLN	target
17-beta-estradiol	ACP5	target
17-beta-estradiol	CASP6	target
cholesteryl ferulate	EDNRA	target
cholesteryl ferulate	POLB	target
cholesteryl ferulate	BACE1	target
cholesteryl ferulate	MET	target
cholesteryl ferulate	ELANE	target
cholesteryl ferulate	ACP1	target
cholesteryl ferulate	HDAC3	target
cholesteryl ferulate	HDAC6	target
cholesteryl ferulate	HDAC2	target
cholesteryl ferulate	HDAC1	target
cholesteryl ferulate	HDAC8	target
cholesteryl ferulate	HDAC11	target
cholesteryl ferulate	HDAC4	target
cholesteryl ferulate	DYRK1A	target
cholesteryl ferulate	CLK1	target
cholesteryl ferulate	PRKCA	target
cholesteryl ferulate	DYRK1B	target
Muscone	CYP19A1	target
Muscone	CA2	target
Muscone	NR1I3	target
Muscone	CES1	target
Muscone	CES2	target
Muscone	CA1	target
Muscone	CA4	target
Muscone	AR	target
Muscone	P2RX7	target
Muscone	PARP1	target
Muscone	EPHX2	target
Muscone	EPHX1	target
Muscone	MTNR1A	target
Muscone	ALOX5	target
Muscone	PTGS1	target
Muscone	PTGS2	target
Muscone	BRD4	target
Muscone	HSD11B1	target
Muscone	TSPO	target
Muscone	CTSK	target
Muscone	S1PR3	target
Muscone	PTGES	target
Muscone	SRD5A1	target
Muscone	GRM5	target
Muscone	GRM1	target
Muscone	KCNA5	target
Muscone	CNR2	target
Muscone	SLC6A3	target
Muscone	CYP17A1	target
Muscone	CNR1	target
Muscone	MAPK14	target
Muscone	CACNA1B	target
Muscone	HSD17B1	target
Muscone	S1PR1	target
Muscone	HTR2B	target
Muscone	SPHK2	target
Muscone	TUBB1	target
Muscone	PREP	target
Muscone	AKT1	target
Muscone	HCRTR2	target
Muscone	HCRTR1	target
beta-sitosterol	ESR1	target
beta-sitosterol	AR	target
beta-sitosterol	PGR	target
beta-sitosterol	NR3C1	target
beta-sitosterol	NCOA2	target
beta-sitosterol	PTGS1	target
beta-sitosterol	PPARG	target
beta-sitosterol	ESR2	target
beta-sitosterol	GSK3B	target
beta-sitosterol	CHEK1	target
beta-sitosterol	PRSS1	target
beta-sitosterol	CHRM3	target
beta-sitosterol	CHRM1	target
beta-sitosterol	ADRA1A	target
beta-sitosterol	CHRM2	target
beta-sitosterol	CHRNA2	target
beta-sitosterol	GABRA1	target
beta-sitosterol	ACHE	target
sitosterol	ESR1	target
sitosterol	AR	target
sitosterol	PGR	target
sitosterol	NR3C1	target
sitosterol	NCOA2	target
sitosterol	NR3C2	target
difurocumenone	PTGS1	target
difurocumenone	ESR1	target
difurocumenone	AR	target
difurocumenone	PPARG	target
difurocumenone	ESR2	target
difurocumenone	GSK3B	target
difurocumenone	NCOA2	target
Germacron	ESR1	target
Germacron	AR	target
Germacron	NR3C1	target
Germacron	ACHE	target
Germacron	GABRA1	target
Germacron	PTGS1	target
Germacron	CHRM1	target
Germacron	PRSS1	target
Germacron	GRIA2	target
curcumin	ESR1	target
curcumin	AR	target
curcumin	PPARG	target
curcumin	ESR2	target
curcumin	GSK3B	target
curcumin	CHEK1	target
curcumin	PRSS1	target
1,7-Diphenyl-3-acetoxy-6(E)-hepten	BCL2L1	target
1,7-Diphenyl-3-acetoxy-6(E)-hepten	BCL2	target
1,7-Diphenyl-3-acetoxy-6(E)-hepten	PLA2G7	target
1,7-Diphenyl-3-acetoxy-6(E)-hepten	FLT1	target
1,7-Diphenyl-3-acetoxy-6(E)-hepten	PDGFRB	target
1,7-Diphenyl-3-acetoxy-6(E)-hepten	TAAR1	target
1,7-Diphenyl-3-acetoxy-6(E)-hepten	TACR1	target
1,7-Diphenyl-3-acetoxy-6(E)-hepten	TACR3	target
1,7-Diphenyl-3-acetoxy-6(E)-hepten	HRH1	target
1,7-Diphenyl-3-acetoxy-6(E)-hepten	TMIGD3	target
1,7-Diphenyl-3-acetoxy-6(E)-hepten	TLR9	target
1,7-Diphenyl-3-acetoxy-6(E)-hepten	FKBP1A	target
1,7-Diphenyl-3-acetoxy-6(E)-hepten	PTAFR	target
1,7-Diphenyl-3-acetoxy-6(E)-hepten	KIT	target
1,7-Diphenyl-3-acetoxy-6(E)-hepten	FLT4	target
1,7-Diphenyl-3-acetoxy-6(E)-hepten	GCGR	target
1,7-Diphenyl-3-acetoxy-6(E)-hepten	PDGFRA	target
4,5-Epoxy-12-acetoxy-7a,11a-dihydrogermacradien-8-one	KIF11	target
4,5-Epoxy-12-acetoxy-7a,11a-dihydrogermacradien-8-one	MME	target
4,5-Epoxy-12-acetoxy-7a,11a-dihydrogermacradien-8-one	CTSK	target
4,5-Epoxy-12-acetoxy-7a,11a-dihydrogermacradien-8-one	CTSS	target
4,5-Epoxy-12-acetoxy-7a,11a-dihydrogermacradien-8-one	HTR2B	target
4,5-Epoxy-12-acetoxy-7a,11a-dihydrogermacradien-8-one	KCNA5	target
4,5-Epoxy-12-acetoxy-7a,11a-dihydrogermacradien-8-one	CMA1	target
4,5-Epoxy-12-acetoxy-7a,11a-dihydrogermacradien-8-one	PREP	target
4,5-Epoxy-12-acetoxy-7a,11a-dihydrogermacradien-8-one	FAP	target
4,5-Epoxy-12-acetoxy-7a,11a-dihydrogermacradien-8-one	CAPN1	target
4,5-Epoxy-12-acetoxy-7a,11a-dihydrogermacradien-8-one	CTSB	target
4,5-Epoxy-12-acetoxy-7a,11a-dihydrogermacradien-8-one	HCRTR2	target
curdione	CYP19A1	target
curdione	PTGS1	target
curdione	CTSD	target
curdione	TRPV1	target
curdione	CCR5	target
curdione	FAAH	target
curdione	MTNR1A	target
curdione	MTNR1B	target
curdione	CTSK	target
curdione	CTSS	target
curdione	CTSB	target
curdione	AR	target
curdione	CTSL	target
curzerenone	SLC6A4	target
curzerenone	SLC6A3	target
curzerenone	PTGS2	target
curzerenone	PABPC1	target
curzerenone	PREP	target
curzerenone	MDM2	target
curzerenone	CTSK	target
curzerenone	CTSL	target
curzerenone	CTSB	target
curzerenone	EPHX1	target
curzerenone	NLRP3	target
curzerenone	PTGS1	target
curzerenone	HTR6	target
curzerenone	HCRTR1	target
curzerenone	NOS2	target
curzerenone	MTNR1A	target
curzerenone	AR	target
curzerenone	CYP17A1	target
curzerenone	CTSC	target
Oxycurcumenol	CYP19A1	target
Oxycurcumenol	FKBP1A	target
Oxycurcumenol	TAAR1	target
Oxycurcumenol	LRRK2	target
Oxycurcumenol	CYP17A1	target
Oxycurcumenol	ABCC9	target
Oxycurcumenol	JAK3	target
Oxycurcumenol	JAK1	target
Oxycurcumenol	JAK2	target
Oxycurcumenol	TYK2	target
Oxycurcumenol	SERPINA6	target
Oxycurcumenol	AR	target
Stigmasterol	ESR1	target
Stigmasterol	AR	target
Stigmasterol	PGR	target
Stigmasterol	NR3C2	target
Stigmasterol	NR3C1	target
Stigmasterol	NCOA2	target
Stigmasterol	ACHE	target
Stigmasterol	PRSS1	target
Stigmasterol	NCOA1	target
Stigmasterol	PTGS1	target
Stigmasterol	PPARG	target
Stigmasterol	AKR1B1	target
Stigmasterol	PLAU	target
Stigmasterol	CHRM3	target
Stigmasterol	CHRM1	target
Stigmasterol	ADRA1A	target
Stigmasterol	CHRM2	target
Stigmasterol	GABRA1	target
Nonacosane	AR	target
Nonacosane	NR3C1	target
Mandenol	PTGS1	target
Mandenol	PPARG	target
Mandenol	ACHE	target
Mandenol	NCOA2	target
(4aS,6aR,6aS,6bR,8aR,10R,12aR,14bS)-10-hydroxy-2,2,6a,6b,9,9,12a-heptamethyl-1,3,4,5,6,6a,7,8,8a,10,11,12,13,14b-tetradecahydropicene-4a-carboxylic acid	AR	target
(4aS,6aR,6aS,6bR,8aR,10R,12aR,14bS)-10-hydroxy-2,2,6a,6b,9,9,12a-heptamethyl-1,3,4,5,6,6a,7,8,8a,10,11,12,13,14b-tetradecahydropicene-4a-carboxylic acid	NR3C1	target
(4aS,6aR,6aS,6bR,8aR,10R,12aR,14bS)-10-hydroxy-2,2,6a,6b,9,9,12a-heptamethyl-1,3,4,5,6,6a,7,8,8a,10,11,12,13,14b-tetradecahydropicene-4a-carboxylic acid	ESR1	target
Ammidin	CHRM1	target
Ammidin	ESR1	target
Ammidin	AR	target
Ammidin	PPARG	target
Ammidin	ESR2	target
Ammidin	GABRA1	target
Ammidin	GSK3B	target
Ammidin	CHEK1	target
isoimperatorin	ESR1	target
Ethyl oleate (NF)	PPARG	target
Ethyl oleate (NF)	ACHE	target
Ethyl oleate (NF)	NCOA2	target
GARDENOSIDE	ESR1	target
GARDENOSIDE	AR	target
geniposide	ESR1	target
geniposide	AR	target
geniposide	BCL2	target
geniposide	GSTM1	target
geniposide	GSTM2	target
4,8,12,16-tetramethylheptadecan-4-olide	VDR	target
4,8,12,16-tetramethylheptadecan-4-olide	PTPN1	target
4,8,12,16-tetramethylheptadecan-4-olide	HMGCR	target
4,8,12,16-tetramethylheptadecan-4-olide	CDC25A	target
4,8,12,16-tetramethylheptadecan-4-olide	PRKCA	target
4,8,12,16-tetramethylheptadecan-4-olide	ACHE	target
4,8,12,16-tetramethylheptadecan-4-olide	HSD11B1	target
4,8,12,16-tetramethylheptadecan-4-olide	OPRK1	target
4,8,12,16-tetramethylheptadecan-4-olide	CYP19A1	target
4,8,12,16-tetramethylheptadecan-4-olide	SIRT2	target
4,8,12,16-tetramethylheptadecan-4-olide	PPP1CC	target
4,8,12,16-tetramethylheptadecan-4-olide	CA2	target
4,8,12,16-tetramethylheptadecan-4-olide	CA9	target
4,8,12,16-tetramethylheptadecan-4-olide	CA1	target
4,8,12,16-tetramethylheptadecan-4-olide	UGT2B7	target
4,8,12,16-tetramethylheptadecan-4-olide	PRKCQ	target
4,8,12,16-tetramethylheptadecan-4-olide	TRPM8	target
4,8,12,16-tetramethylheptadecan-4-olide	PRKCD	target
Hentriacontan	SHBG	target
isoimperatorin	BACE1	target
isoimperatorin	SRD5A1	target
isoimperatorin	CA9	target
isoimperatorin	KCNA5	target
isoimperatorin	MAOA	target
isoimperatorin	ALOX5	target
isoimperatorin	MAOB	target
isoimperatorin	ALOX15	target
isoimperatorin	CD38	target
isoimperatorin	OPRK1	target
isoimperatorin	CBR1	target
isoimperatorin	PIK3CD	target
isoimperatorin	PIK3CB	target
isoimperatorin	PIK3CG	target
Supraene	PPARA	target
Supraene	CNR2	target
