# Supplementary material for: Network pharmacology to investigate the pharmacological mechanisms of muscone in Xingnaojing injections for the treatment of severe traumatic brain injury
Source: PeerJ journal article supplement (doi:10.7717/peerj.11696), 2021-07-20
Supplement: supporting_information_of_Fig1-Fig3.zip [file Targets of XNJI components.xlsx]

## Sheet: Targets of XNJI components
Molecule Name	Target
Isoborneol	GABRA1
Isoborneol	PRSS1
Isoborneol	CHRM3
Isoborneol	CHRM1
Isoborneol	ACHE
Isoborneol	ADRA1A
Isoborneol	ESR1
Isoborneol	AR
Isoborneol	PGR
Caryophyllene	PTGS1
Caryophyllene	CHRM3
Caryophyllene	CHRM1
Caryophyllene	ESR1
Caryophyllene	ACHE
Caryophyllene	CHRM2
Caryophyllene	CHRNA2
Caryophyllene	GABRA1
Caryophyllene	NCOA2
Caryophyllene	ADRA1A
Caryophyllene	PRSS1
1,8-cineole	ACHE
1,8-cineole	GABRA1
1,8-cineole	PRSS1
1,8-cineole	ADH1B
1,8-cineole	CHRNA2
Borneol	CHRM2
Borneol	GABRA1
Borneol	PRSS1
Borneol	PTGS1
Borneol	ESR1
Borneol	ACHE
Borneol	NCOA2
camphor	ESR1
camphor	AR
camphor	NR3C1
camphor	ACHE
camphor	GABRA1
camphor	PRSS1
β-Elemene	ACHE
β-Elemene	CHRM2
β-Elemene	GABRA1
β-Elemene	PRSS1
β-Elemene	PTGS1
β-Elemene	CHRM3
β-Elemene	CHRM1
β-Elemene	ADRA1A
β-Elemene	NCOA2
β-Elemene	ESR1
Erythrodiol	ESR1
Erythrodiol	AR
Erythrodiol	NR3C1
dipterocarpol	AR
dipterocarpol	NR3C1
cholesterol	ESR1
cholesterol	AR
cholesterol	PGR
cholesterol	NR3C2
cholesterol	NR3C1
cholesterol	PRSS1
cholesterol	NCOA2
n-nornuciferine	PTGS1
n-nornuciferine	CHRM3
n-nornuciferine	CHRM1
n-nornuciferine	ESR1
n-nornuciferine	AR
n-nornuciferine	HTR3A
n-nornuciferine	ACHE
n-nornuciferine	ADRA1A
n-nornuciferine	ESR2
n-nornuciferine	GABRA1
n-nornuciferine	CHEK1
17-beta-estradiol	CHRM3
17-beta-estradiol	CHRM1
17-beta-estradiol	ESR1
17-beta-estradiol	AR
17-beta-estradiol	ACHE
17-beta-estradiol	ADRA1A
17-beta-estradiol	CHRM2
17-beta-estradiol	ESR2
17-beta-estradiol	RELA
17-beta-estradiol	BCL2
17-beta-estradiol	CASP3
17-beta-estradiol	CASP8
17-beta-estradiol	PRKCA
17-beta-estradiol	CYP3A4
17-beta-estradiol	CAV1
17-beta-estradiol	CASP7
17-beta-estradiol	CYP1A1
17-beta-estradiol	SELE
17-beta-estradiol	VCAM1
17-beta-estradiol	NOS3
17-beta-estradiol	LITAF
17-beta-estradiol	GABBR1
17-beta-estradiol	TYR
17-beta-estradiol	GSTP1
17-beta-estradiol	SLC2A4
17-beta-estradiol	HSF1
17-beta-estradiol	PGR
17-beta-estradiol	AKR1B1
17-beta-estradiol	KLK3
17-beta-estradiol	APOA1
17-beta-estradiol	SMAD3
17-beta-estradiol	ELN
17-beta-estradiol	FBN1
17-beta-estradiol	NCOA1
17-beta-estradiol	OCLN
17-beta-estradiol	ACP5
17-beta-estradiol	CASP6
cholesteryl ferulate	EDNRA
cholesteryl ferulate	POLB
cholesteryl ferulate	BACE1
cholesteryl ferulate	PDE9A
cholesteryl ferulate	PDE1B
cholesteryl ferulate	MET
cholesteryl ferulate	ELANE
cholesteryl ferulate	ACP1
cholesteryl ferulate	HDAC3
cholesteryl ferulate	HDAC6
cholesteryl ferulate	HDAC2
cholesteryl ferulate	HDAC1
cholesteryl ferulate	HDAC8
cholesteryl ferulate	HDAC11
cholesteryl ferulate	HDAC4
cholesteryl ferulate	DYRK1A
cholesteryl ferulate	CLK1
cholesteryl ferulate	PRKCA
cholesteryl ferulate	DYRK2
cholesteryl ferulate	DYRK1B
Muscone	CYP19A1
Muscone	CA2
Muscone	NR1I3
Muscone	CES1
Muscone	CES2
Muscone	CA1
Muscone	PUMA
Muscone	CA4
Muscone	AR
Muscone	P2RX7
Muscone	PARP1
Muscone	EPHX2
Muscone	EPHX1
Muscone	MTNR1A
Muscone	MTNR1B
Muscone	ALOX5
Muscone	PTGS1
Muscone	PTGS2
Muscone	BRD4
Muscone	HSD11B1
Muscone	TSPO
Muscone	CTSK
Muscone	NQO2
Muscone	S1PR3
Muscone	PTGES
Muscone	SRD5A1
Muscone	GRM5
Muscone	GRM1
Muscone	KCNA5
Muscone	CNR2
Muscone	SLC6A3
Muscone	PAOX
Muscone	CYP17A1
Muscone	CNR1
Muscone	HSD17B2
Muscone	MAPK14
Muscone	CACNA1B
Muscone	HSD17B1
Muscone	S1PR1
Muscone	HTR2B
Muscone	SPHK2
Muscone	TUBB1
Muscone	PREP
Muscone	AKT1
Muscone	HCRTR2
Muscone	HCRTR1
beta-sitosterol	CHRM4
beta-sitosterol	ESR1
beta-sitosterol	AR
beta-sitosterol	PGR
beta-sitosterol	NR3C1
beta-sitosterol	NCOA2
beta-sitosterol	PTGS1
beta-sitosterol	PPARG
beta-sitosterol	ESR2
beta-sitosterol	GSK3B
beta-sitosterol	CHEK1
beta-sitosterol	PRSS1
beta-sitosterol	CHRM3
beta-sitosterol	CHRM1
beta-sitosterol	ADRA1A
beta-sitosterol	CHRM2
beta-sitosterol	CHRNA2
beta-sitosterol	GABRA1
beta-sitosterol	ACHE
sitosterol	ESR1
sitosterol	AR
sitosterol	PGR
sitosterol	NR3C1
sitosterol	NCOA2
sitosterol	NR3C2
difurocumenone	PTGS1
difurocumenone	ESR1
difurocumenone	AR
difurocumenone	PPARG
difurocumenone	ESR2
difurocumenone	GSK3B
difurocumenone	NCOA2
Germacron	ESR1
Germacron	AR
Germacron	NR3C1
Germacron	ACHE
Germacron	GABRA1
Germacron	PTGS1
Germacron	CHRM1
Germacron	PRSS1
Germacron	GRIA2
curcumin	ESR1
curcumin	AR
curcumin	PPARG
curcumin	ESR2
curcumin	GSK3B
curcumin	CHEK1
curcumin	PRSS1
1,7-Diphenyl-3-acetoxy-6(E)-hepten	BCL2L1
1,7-Diphenyl-3-acetoxy-6(E)-hepten	BCL2
1,7-Diphenyl-3-acetoxy-6(E)-hepten	PLA2G7
1,7-Diphenyl-3-acetoxy-6(E)-hepten	FLT1
1,7-Diphenyl-3-acetoxy-6(E)-hepten	PDGFRB
1,7-Diphenyl-3-acetoxy-6(E)-hepten	TAAR1
1,7-Diphenyl-3-acetoxy-6(E)-hepten	PANK3
1,7-Diphenyl-3-acetoxy-6(E)-hepten	TACR1
1,7-Diphenyl-3-acetoxy-6(E)-hepten	TACR3
1,7-Diphenyl-3-acetoxy-6(E)-hepten	HRH1
1,7-Diphenyl-3-acetoxy-6(E)-hepten	TMIGD3
1,7-Diphenyl-3-acetoxy-6(E)-hepten	TLR9
1,7-Diphenyl-3-acetoxy-6(E)-hepten	FKBP1A
1,7-Diphenyl-3-acetoxy-6(E)-hepten	PTAFR
1,7-Diphenyl-3-acetoxy-6(E)-hepten	KIT
1,7-Diphenyl-3-acetoxy-6(E)-hepten	FLT4
1,7-Diphenyl-3-acetoxy-6(E)-hepten	GCGR
1,7-Diphenyl-3-acetoxy-6(E)-hepten	FRK
1,7-Diphenyl-3-acetoxy-6(E)-hepten	PTK6
1,7-Diphenyl-3-acetoxy-6(E)-hepten	CDK8
1,7-Diphenyl-3-acetoxy-6(E)-hepten	CDK19
1,7-Diphenyl-3-acetoxy-6(E)-hepten	PTGES2
1,7-Diphenyl-3-acetoxy-6(E)-hepten	BRPF1
1,7-Diphenyl-3-acetoxy-6(E)-hepten	PDGFRA
4,5-Epoxy-12-acetoxy-7a,11a-dihydrogermacradien-8-one	KIF11
4,5-Epoxy-12-acetoxy-7a,11a-dihydrogermacradien-8-one	MME
4,5-Epoxy-12-acetoxy-7a,11a-dihydrogermacradien-8-one	CTSK
4,5-Epoxy-12-acetoxy-7a,11a-dihydrogermacradien-8-one	CTSS
4,5-Epoxy-12-acetoxy-7a,11a-dihydrogermacradien-8-one	HTR2B
4,5-Epoxy-12-acetoxy-7a,11a-dihydrogermacradien-8-one	KCNA5
4,5-Epoxy-12-acetoxy-7a,11a-dihydrogermacradien-8-one	CMA1
4,5-Epoxy-12-acetoxy-7a,11a-dihydrogermacradien-8-one	PDE10A
4,5-Epoxy-12-acetoxy-7a,11a-dihydrogermacradien-8-one	PREP
4,5-Epoxy-12-acetoxy-7a,11a-dihydrogermacradien-8-one	CCNE2
4,5-Epoxy-12-acetoxy-7a,11a-dihydrogermacradien-8-one	FAP
4,5-Epoxy-12-acetoxy-7a,11a-dihydrogermacradien-8-one	CAPN1
4,5-Epoxy-12-acetoxy-7a,11a-dihydrogermacradien-8-one	CTSB
4,5-Epoxy-12-acetoxy-7a,11a-dihydrogermacradien-8-one	TDO2
4,5-Epoxy-12-acetoxy-7a,11a-dihydrogermacradien-8-one	PYGL
4,5-Epoxy-12-acetoxy-7a,11a-dihydrogermacradien-8-one	HCRTR2
curdione	CYP19A1
curdione	PTGS1
curdione	CTSD
curdione	TRPV1
curdione	CCR5
curdione	FAAH
curdione	MTNR1A
curdione	MTNR1B
curdione	SIGMAR1
curdione	CTSK
curdione	CTSS
curdione	CTSB
curdione	AR
curdione	CTSL
curzerenone	SLC6A4
curzerenone	SLC6A3
curzerenone	PTGS2
curzerenone	PABPC1
curzerenone	HSD17B2
curzerenone	PREP
curzerenone	MDM2
curzerenone	CTSK
curzerenone	CTSL
curzerenone	CTSB
curzerenone	EPHX1
curzerenone	NLRP3
curzerenone	PTGS1
curzerenone	HTR6
curzerenone	HCRTR1
curzerenone	NOS2
curzerenone	MTNR1A
curzerenone	AR
curzerenone	CYP17A1
curzerenone	CTSC
Oxycurcumenol	CYP19A1
Oxycurcumenol	FKBP1A
Oxycurcumenol	TAAR1
Oxycurcumenol	LRRK2
Oxycurcumenol	CYP17A1
Oxycurcumenol	CCNB2
Oxycurcumenol	ABCC9
Oxycurcumenol	JAK3
Oxycurcumenol	JAK1
Oxycurcumenol	JAK2
Oxycurcumenol	TYK2
Oxycurcumenol	SERPINA6
Oxycurcumenol	AR
Stigmasterol	ESR1
Stigmasterol	AR
Stigmasterol	PGR
Stigmasterol	NR3C2
Stigmasterol	NR3C1
Stigmasterol	IGHG1
Stigmasterol	NCOA2
Stigmasterol	ACHE
Stigmasterol	PRSS1
Stigmasterol	NCOA1
Stigmasterol	PTGS1
Stigmasterol	PPARG
Stigmasterol	AKR1B1
Stigmasterol	PLAU
Stigmasterol	CHRM3
Stigmasterol	CHRM1
Stigmasterol	ADRA1A
Stigmasterol	CHRM2
Stigmasterol	GABRA1
Nonacosane	AR
Nonacosane	ADH1A
Nonacosane	NR3C1
Mandenol	PTGS1
Mandenol	PPARG
Mandenol	ACHE
Mandenol	NCOA2
(4aS,6aR,6aS,6bR,8aR,10R,12aR,14bS)-10-hydroxy-2,2,6a,6b,9,9,12a-heptamethyl-1,3,4,5,6,6a,7,8,8a,10,11,12,13,14b-tetradecahydropicene-4a-carboxylic acid	AR
(4aS,6aR,6aS,6bR,8aR,10R,12aR,14bS)-10-hydroxy-2,2,6a,6b,9,9,12a-heptamethyl-1,3,4,5,6,6a,7,8,8a,10,11,12,13,14b-tetradecahydropicene-4a-carboxylic acid	NR3C1
(4aS,6aR,6aS,6bR,8aR,10R,12aR,14bS)-10-hydroxy-2,2,6a,6b,9,9,12a-heptamethyl-1,3,4,5,6,6a,7,8,8a,10,11,12,13,14b-tetradecahydropicene-4a-carboxylic acid	ESR1
Ammidin	CHRM1
Ammidin	ESR1
Ammidin	AR
Ammidin	PPARG
Ammidin	ESR2
Ammidin	GABRA1
Ammidin	GSK3B
Ammidin	CHEK1
isoimperatorin	ESR1
Ethyl oleate (NF)	PPARG
Ethyl oleate (NF)	ACHE
Ethyl oleate (NF)	NCOA2
GARDENOSIDE	ESR1
GARDENOSIDE	AR
geniposide	ESR1
geniposide	AR
geniposide	BCL2
geniposide	GSTM1
geniposide	GSTM2
4,8,12,16-tetramethylheptadecan-4-olide	VDR
4,8,12,16-tetramethylheptadecan-4-olide	PTPN1
4,8,12,16-tetramethylheptadecan-4-olide	HMGCR
4,8,12,16-tetramethylheptadecan-4-olide	CDC25A
4,8,12,16-tetramethylheptadecan-4-olide	PRKCA
4,8,12,16-tetramethylheptadecan-4-olide	ACHE
4,8,12,16-tetramethylheptadecan-4-olide	HSD11B1
4,8,12,16-tetramethylheptadecan-4-olide	OPRK1
4,8,12,16-tetramethylheptadecan-4-olide	CYP19A1
4,8,12,16-tetramethylheptadecan-4-olide	SIRT2
4,8,12,16-tetramethylheptadecan-4-olide	CTRB1
4,8,12,16-tetramethylheptadecan-4-olide	KLK10
4,8,12,16-tetramethylheptadecan-4-olide	PPM1B
4,8,12,16-tetramethylheptadecan-4-olide	PPP1CC
4,8,12,16-tetramethylheptadecan-4-olide	CA2
4,8,12,16-tetramethylheptadecan-4-olide	CA9
4,8,12,16-tetramethylheptadecan-4-olide	CA1
4,8,12,16-tetramethylheptadecan-4-olide	UGT2B7
4,8,12,16-tetramethylheptadecan-4-olide	PRKCQ
4,8,12,16-tetramethylheptadecan-4-olide	TRPM8
4,8,12,16-tetramethylheptadecan-4-olide	PRKCD
4,8,12,16-tetramethylheptadecan-4-olide	GPR119
Hentriacontan	SHBG
isoimperatorin	BACE1
isoimperatorin	KCNA3
isoimperatorin	SRD5A1
isoimperatorin	CA12
isoimperatorin	CA9
isoimperatorin	KCNA5
isoimperatorin	MAOA
isoimperatorin	ALOX5
isoimperatorin	MAOB
isoimperatorin	ALOX15
isoimperatorin	CA7
isoimperatorin	CA14
isoimperatorin	CA13
isoimperatorin	CA5B
isoimperatorin	CD38
isoimperatorin	OPRK1
isoimperatorin	CBR1
isoimperatorin	PIK3CD
isoimperatorin	PIK3CB
isoimperatorin	PIK3CG
Supraene	PPARA
Supraene	GGPS1
Supraene	CNR2
Supraene	SQLE
