# Supplementary material for: Network pharmacology to investigate the pharmacological mechanisms of muscone in Xingnaojing injections for the treatment of severe traumatic brain injury
Source: PeerJ journal article supplement (doi:10.7717/peerj.11696), 2021-07-20
Supplement: supporting_information_of_Fig1-Fig3.zip [file Venn.xlsx]

## Sheet: Sheet1
TBI-Target	XNJI-Target
A2M	CHRM4
A2ML1	IGHG1
A4GALT	GGPS1
AADAC	ADH1A
AAMP	CCNB2
AARS1	CCNE2
AARS2	CTRB1
AASS	KLK10
AATF	PUMA
ABAT	FRK
ABCA1	PTK6
ABCA12	CDK8
ABCA2	CDK19
ABCA3	PTGES2
ABCA4	BRPF1
ABCA6	CA12
ABCA7	CA13
ABCA8	CA14
ABCB1	CA5B
ABCB10	CA7
ABCB11	DYRK2
ABCB4	GPR119
ABCB6	HSD17B2
ABCB7	KCNA3
ABCC1	MTNR1B
ABCC2	NQO2
ABCC3	PANK3
ABCC4	PAOX
ABCC5	PDE10A
ABCC6	PDE1B
ABCC8	PDE9A
ABCC9	PPM1B
ABCD1	PYGL
ABCD3	SQLE
ABCD4	TDO2
ABCE1	ACHE
ABCF1	ADRA1A
ABCG1	CHRM1
ABCG2	CHRM2
ABCG5	CHRM3
ABCG8	ESR1
ABHD5	GABRA1
ABL1	NCOA2
ABO	PRSS1
ABR	PTGS1
ABRA	CNR2
ABRAXAS2	PPARA
ABT1	AKR1B1
ABTB2	AR
ACAA2	NCOA1
ACACA	NR3C1
ACACB	NR3C2
ACAD9	PGR
ACADM	PLAU
ACADS	PPARG
ACADVL	ABCC9
ACAN	CYP17A1
ACAP2	CYP19A1
ACBD3	FKBP1A
ACBD6	JAK1
ACD	JAK2
ACE	JAK3
ACE2	LRRK2
ACER3	SERPINA6
ACHE	TAAR1
ACIN1	TYK2
ACKR1	CHEK1
ACKR2	ESR2
ACKR3	HTR3A
ACMSD	AKT1
ACO1	ALOX5
ACO2	BRD4
ACOD1	CA1
ACOT11	CA2
ACOT12	CA4
ACOT13	CACNA1B
ACOT7	CES1
ACOX1	CES2
ACOX2	CNR1
ACP1	CTSK
ACP3	EPHX1
ACP5	EPHX2
ACP6	GRM1
ACR	GRM5
ACSF3	HCRTR1
ACSL5	HCRTR2
ACSL6	HSD11B1
ACSM3	HSD17B1
ACSS2	HTR2B
ACTA1	KCNA5
ACTA2	MAPK14
ACTB	MTNR1A
ACTC1	NR1I3
ACTG1	P2RX7
ACTG2	PARP1
ACTL7B	PREP
ACTL8	PTGES
ACTN1	PTGS2
ACTN2	S1PR1
ACTN3	S1PR3
ACTN4	SLC6A3
ACTR1B	SPHK2
ACTR2	SRD5A1
ACTR3	TSPO
ACTRT2	TUBB1
ACVR1	ALOX15
ACVR1B	BACE1
ACVR2A	CA9
ACVRL1	CBR1
ACY1	CD38
AD10	MAOA
AD11	MAOB
AD12	OPRK1
AD13	PIK3CB
AD14	PIK3CD
AD15	PIK3CG
AD16	SHBG
AD17	GRIA2
AD5	BCL2
AD6	GSTM1
AD7	GSTM2
AD8	GSK3B
AD9	CTSB
ADA	CTSC
ADA2	CTSL
ADAD1	HTR6
ADAM10	MDM2
ADAM11	NLRP3
ADAM12	NOS2
ADAM15	PABPC1
ADAM17	SLC6A4
ADAM19	CCR5
ADAM22	CTSD
ADAM28	CTSS
ADAM33	FAAH
ADAM3A	SIGMAR1
ADAM8	TRPV1
ADAM9	ACP1
ADAMTS1	CLK1
ADAMTS12	DYRK1A
ADAMTS13	DYRK1B
ADAMTS14	EDNRA
ADAMTS15	ELANE
ADAMTS2	HDAC1
ADAMTS20	HDAC11
ADAMTS3	HDAC2
ADAMTS4	HDAC3
ADAMTS5	HDAC4
ADAMTS7	HDAC6
ADAMTS8	HDAC8
ADAMTS9	MET
ADAMTSL1	POLB
ADAMTSL4	PRKCA
ADAR	CHRNA2
ADAT3	CDC25A
ADCY1	HMGCR
ADCY10	PPP1CC
ADCY2	PRKCD
ADCY3	PRKCQ
ADCY5	PTPN1
ADCY8	SIRT2
ADCY9	TRPM8
ADCYAP1	UGT2B7
ADD1	VDR
ADD2	CAPN1
ADD3	CMA1
ADD3-AS1	FAP
ADGRD1	KIF11
ADGRE1	MME
ADGRG1	ACP5
ADGRL2	APOA1
ADGRV1	CASP3
ADH1B	CASP6
ADH1C	CASP7
ADH6	CASP8
ADH7	CAV1
ADIPOQ	CYP1A1
ADIPOR1	CYP3A4
ADIPOR2	ELN
ADK	FBN1
ADM	GABBR1
ADM2	GSTP1
ADNP	HSF1
ADORA1	KLK3
ADORA2A	LITAF
ADORA2B	NOS3
ADORA3	OCLN
ADPRH	RELA
ADRA1A	SELE
ADRA1B	SLC2A4
ADRA1D	SMAD3
ADRA2A	TYR
ADRA2B	VCAM1
ADRA2C	ADH1B
ADRB1	BCL2L1
ADRB2	FLT1
ADRB3	FLT4
ADSL	GCGR
ADSS1	HRH1
ADTRP	KIT
AEBP1	PDGFRA
AFAP1	PDGFRB
AFAP1-AS1	PLA2G7
AFAP1L2	PTAFR
AFDN	TACR1
AFF2	TACR3
AFF4	TLR9
AFG3L2	TMIGD3
AFM
AFP
AGA
AGAP1
AGAP11
AGAP2
AGAP6
AGBL1
AGBL2
AGBL3
AGBL4
AGBL5
AGER
AGFG1
AGGF1
AGK
AGL
AGMAT
AGMO
AGO2
AGO61
AGPAT1
AGPAT2
AGPAT5
AGR2
AGRN
AGT
AGTPBP1
AGTR1
AGTR2
AGXT
AGXT2
AHCY
AHDC1
AHI1
AHNAK
AHR
AHSG
AHSP
AIBP
AIF1
AIFM1
AIFM3
AIM2
AIMP1
AIMP2
AIP
AIR
AIRE
AJAP1
AK1
AK2
AK5
AKAP1
AKAP12
AKAP13
AKAP5
AKAP6
AKAP9
AKIP1
AKR1A1
AKR1B1
AKR1B10
AKR1C1
AKR1C2
AKR1C4
AKR1D1
AKR1E2
AKR7A2
AKT1
AKT1S1
AKT2
AKT3
AKTIP
ALAD
ALAS1
ALB
ALCAM
ALDH18A1
ALDH1A1
ALDH1A2
ALDH1B1
ALDH1L1
ALDH2
ALDH3A1
ALDH3A2
ALDH4A1
ALDH5A1
ALDH6A1
ALDH7A1
ALDH9A1
ALDOA
ALDOB
ALG10B
ALG13
ALG3
ALK
ALKBH5
ALKBH8
ALLC
ALMS1
ALOX12
ALOX12B
ALOX15
ALOX15B
ALOX5
ALOX5AP
ALOXE3
ALPI
ALPL
ALPP
ALS2
ALX3
ALX4
ALYREF
AMACR
AMBP
AMD1
AMFR
AMH
AMOT
AMOTL1
AMOTL2
AMPD1
AMPD2
AMPD3
AMY1A
ANAPC2
ANAPC5
ANG
ANGPT1
ANGPT2
ANGPTL2
ANGPTL3
ANGPTL4
ANGPTL6
ANGPTL8
ANK1
ANK2
ANK3
ANKAR
ANKFN1
ANKH
ANKK1
ANKLE2
ANKRD1
ANKRD11
ANKRD12
ANKRD2
ANKRD23
ANKRD26
ANKRD31
ANKRD55
ANKRD6
ANKS1A
ANKS1B
ANKS6
ANLN
ANO1
ANO3
ANO5
ANOVA
ANP32A
ANPEP
ANTXR2
ANXA1
ANXA2
ANXA2P3
ANXA3
ANXA4
ANXA5
ANXA6
ANXA7
ANXA8
AOC1
AOC3
AOPEP
AOX1
AP1S1
AP1S2
AP1S3
AP2M1
AP2S1
AP3B1
AP3D1
AP4B1
AP4B1-AS1
AP4E1
AP4M1
AP4S1
AP5B1
APAF1
APBA1
APBA2
APBA3
APBB1
APBB1IP
APBB2
APBB3
APC
APC2
APCDD1
APCL
APCS
APEH
APELA
APEX1
APH1A
APH1B
APIP
APLN
APLNR
APLP1
APLP2
APOA1
APOA1BP
APOA2
APOA4
APOA5
APOB
APOBEC1
APOBEC3G
APOC1
APOC2
APOC3
APOD
APOE
APOH
APOL1
APOL2
APOL4
APOM
APOO
APP
APPL1
APRT
APTR
APTX
AQP1
AQP10
AQP11
AQP2
AQP3
AQP4
AQP5
AQP7
AQP8
AQP9
AQR
AR
ARC
ARCN1
AREG
AREL1
ARF1
ARF4
ARF6
ARFGEF2
ARG1
ARG2
ARGLU1
ARH12
ARHA
ARHGAP1
ARHGAP15
ARHGAP24
ARHGAP26
ARHGAP29
ARHGAP4
ARHGAP45
ARHGAP9
ARHGDIA
ARHGDIB
ARHGEF1
ARHGEF10
ARHGEF11
ARHGEF12
ARHGEF15
ARHGEF16
ARHGEF17
ARHGEF18
ARHGEF2
ARHGEF26
ARHGEF3
ARHGEF4
ARHGEF6
ARHGEF7
ARHGEF9
ARID1A
ARID1B
ARID2
ARID3A
ARID3B
ARL13B
ARL15
ARL6
ARL6IP1
ARMC4
ARMCX1
ARNT
ARNT2
ARNTL
ARPC1B
ARPC5
ARRB1
ARRB2
ARSA
ARSB
ARSG
ARSH
ART1
ART3
ARTN
ARV1
ARVCF
ARX
ASAH1
ASAH2
ASAH2B
ASB14
ASB2
ASCC1
ASCC2
ASCL1
ASGR1
ASGR2
ASH2L
ASIC1
ASIC2
ASIC3
ASIC5
ASIP
ASL
ASNS
ASPA
ASPH
ASPM
ASPN
ASPRS.LBSL
ASPRV1
ASS1
ASTN2
ASXL1
ASXL2
ASXL3
ATAD1
ATAD2
ATAT1
ATCAY
ATE1
ATF1
ATF2
ATF3
ATF4
ATF5
ATF6
ATG10
ATG12
ATG13
ATG14
ATG16L1
ATG2A
ATG3
ATG4B
ATG5
ATG7
ATG9A
ATIC
ATL1
ATL2
ATL3
ATM
ATN1
ATOH7
ATOH8
ATOX1
ATP11A
ATP12A
ATP13A2
ATP1A1
ATP1A1-AS1
ATP1A2
ATP1A3
ATP1B1
ATP2A1
ATP2A2
ATP2A3
ATP2B1
ATP2B2
ATP2B3
ATP2B4
ATP2C1
ATP2C2
ATP4A
ATP5F1A
ATP5F1B
ATP5F1C
ATP5F1E
ATP5IF1
ATP5MG
ATP5PB
ATP5PD
ATP5PF
ATP5PO
ATP6AP2
ATP6V0A1
ATP6V0A2
ATP6V0A4
ATP6V0C
ATP6V1A
ATP6V1B1
ATP6V1E1
ATP7A
ATP7B
ATP8A1
ATP8B1
ATPAF2
ATPSCKMT
ATR
ATRIP
ATRN
ATRX
ATXN1
ATXN2
ATXN3
ATXN7
AUP1
AURKA
AURKB
AUTS2
AVEN
AVIL
AVP
AVPR1A
AVPR1B
AVPR2
AXIN1
AXIN2
AXL
AZGP1
AZIN2
AZU1
B2M
B3GALNT2
B3GALT4
B3GALT5-AS1
B3GALT6
B3GAT1
B3GNT1
B4GALNT1
B4GALT1
B4GALT6
B4GALT7
B4GAT1
B9D1
B9D2
BAALC
BAAT
BACE1
BACE1-AS
BACE2
BACH1
BACH2
BAD
BAG1
BAG3
BAG4
BAG5
BAIAP2
BAIDCS
BAK1
BAMBI
BANDDOS
BANF1
BANK1
BAP1
BARD1
BARX1
BASP1
BATF
BAX
BAZ1B
BAZ2B
BBC3
BBS1
BBS10
BBS12
BBS2
BBS4
BBS5
BBS7
BBS9
BCAM
BCAN
BCAP31
BCAR1
BCAT1
BCHE
BCK
BCKDHA
BCKDHB
BCKDK
BCL10
BCL11A
BCL11B
BCL2
BCL2L1
BCL2L11
BCL2L13
BCL2L14
BCL2L15
BCL2L2
BCL3
BCL6
BCL6B
BCL9
BCO1
BCOR
BCORL1
BCR
BCS1L
BCYRN1
BDH1
BDKRB1
BDKRB2
BDNF
BDNF-AS
BDPLT22
BEAN
BECN1
BEGAIN
BEST1
BEX1
BEX2
BEX4
BFAR
BFSP2
BGLAP
BGN
BHLHE40
BHMT
BHMT2
BICD2
BID
BIN1
BIRC2
BIRC3
BIRC5
BLK
BLM
BLMH
BLNK
BLOC1S1
BLOC1S6
BLVRA
BLVRB
BLZF1
BMI1
BMP1
BMP2
BMP3
BMP4
BMP5
BMP6
BMP7
BMPR1A
BMPR1B
BMPR2
BMX
BNC1
BNC2
BNIP3
BNIP3L
BOK
BOLA3
BOLL
BPI
BPIFA1
BPIFB4
BPTF
BRAF
BRAT1
BRCA1
BRCA2
BRCC3
BRCC4
BRCC45
BRD2
BRD3
BRD4
BRDT
BRE
BRI3
BRMUTD
BRPF3
BRS3
BSCL2
BSF2
BSG
BSND
BSPRY
BST2
BSVD
BSVD1
BSVD2
BSVD3
BSX1
BTBD14B
BTC
BTD
BTF3L4P2
BTG1
BTG2
BTG3
BTK
BTLA
BTNL2
BTPS2
BTRC
BUB1B
BUD23
BVES
C10orf113
C12orf4
C12orf57
C12orf65
C16orf58
C16orf95
C19orf12
C19orf33
C19orf48
C19orf53
C19orf61
C19orf81
C1D
C1GALT1
C1GALT1C1
C1orf112
C1orf194
C1orf220
C1orf54
C1orf68
C1QA
C1QB
C1QBP
C1QC
C1QTNF1
C1QTNF3
C1R
C1S
C2
C2CD3
C2CD4A
C3
C3AR1
C3orf38
C3orf39
C4A
C4B
C4B_2
C4BPA
C4BPB
C5
C5AR1
C5AR2
C6orf62
C7
C7orf50
C8G
C9
C9orf72
C9orf78
CA1
CA10
CA2
CA3
CA4
CA5A
CA6
CA9
CABIN1
CACNA1A
CACNA1B
CACNA1C
CACNA1D
CACNA1F
CACNA1G
CACNA1H
CACNA1I
CACNA1S
CACNA2D1
CACNA2D2
CACNB1
CACNB2
CACNB3
CACNB4
CACNG1
CACNG2
CACNG3
CACNG6
CACYBP
CADM1
CADPS
CAGE1
CALB1
CALB2
CALCA
CALCR
CALCRL
CALHM1
CALM1
CALM2
CALM3
CALML3
CALML4
CALML5
CALML6
CALR
CALR3
CALU
CAMK1
CAMK2A
CAMK2B
CAMK2G
CAMK2N1
CAMK4
CAMKK2
CAMP
CAMRQ2
CAMSAP2
CAMTA1
CANT1
CANX
CAP1
CAP23
CAPB
CAPN1
CAPN2
CAPN3
CAPN5
CAPN8
CAPN9
CAPNS1
CAPNS2
CAPR
CAPS
CAPZA2
CARD10
CARD11
CARD14
CARD16
CARD9
CARKD
CARM1
CARMIL2
CARNMT1
CARS2
CARTPT
CASC3
CASD1
CASK
CASP1
CASP10
CASP12
CASP14
CASP2
CASP3
CASP4
CASP5
CASP6
CASP7
CASP8
CASP9
CASQ1
CASQ2
CASR
CAST
CASTOR3
CASZ1
CAT
CAT1
CAV1
CAV2
CAV3
CAVIN1
CAVIN4
CBFA2T3
CBL
CBLIF
CBR1
CBR3-AS1
CBR4
CBS
CBSL
CBX7
CBX8
CC2D1A
CC2D2A
CCAR1
CCAT1
CCBE1
CCDC103
CCDC114
CCDC12
CCDC122
CCDC124
CCDC14
CCDC144A
CCDC148
CCDC151
CCDC170
CCDC177
CCDC22
CCDC39
CCDC40
CCDC47
CCDC54
CCDC65
CCDC80
CCDC85A
CCDC85B
CCDC85C
CCDC88A
CCDC88B
CCDC88C
CCDC89
CCK
CCKAR
CCKBR
CCL1
CCL11
CCL13
CCL14
CCL16
CCL17
CCL18
CCL19
CCL2
CCL20
CCL21
CCL22
CCL24
CCL25
CCL26
CCL27
CCL28
CCL3
CCL3L1
CCL4
CCL4L1
CCL4L2
CCL5
CCL7
CCL8
CCM2
CCN1
CCN2
CCN3
CCN4
CCN5
CCN6
CCNA1
CCNA2
CCNB1
CCNC
CCND1
CCND2
CCND3
CCNDBP1
CCNE1
CCNG1
CCNI
CCNO
CCPG1
CCR1
CCR2
CCR3
CCR4
CCR5
CCR6
CCR7
CCR8
CCR9
CCS
CCSER1
CCT3
CCT5
CD14
CD151
CD160
CD163
CD177
CD180
CD19
CD1A
CD1B
CD1C
CD1D
CD1E
CD2
CD200
CD200R1
CD209
CD22
CD226
CD24
CD247
CD248
CD27
CD274
CD276
CD28
CD2AP
CD2-LCR
CD300A
CD300E
CD300LB
CD300LF
CD320
CD33
CD34
CD36
CD38
CD3D
CD3E
CD3EAP
CD3G
CD4
CD40
CD40LG
CD44
CD46
CD47
CD5
CD52
CD53
CD55
CD58
CD59
CD5L
CD63
CD68
CD69
CD7
CD70
CD72
CD74
CD79A
CD79B
CD80
CD81
CD82
CD83
CD86
CD8A
CD9
CD93
CD99
CDA
CDC123
CDC14A
CDC20
CDC25A
CDC25B
CDC25C
CDC34
CDC42
CDC42EP3
CDC42SE2
CDC45
CDC5L
CDC6
CDC73
CDC91L1
CDCA5
CDCBM1
CDCBM2
CDCBM3
CDCBM4
CDCBM5
CDCBM6
CDCBM7
CDCBM8
CDCBM9
CDH1
CDH10
CDH11
CDH13
CDH15
CDH16
CDH17
CDH2
CDH23
CDH3
CDH4
CDH5
CDIP1
CDK1
CDK10
CDK12
CDK13
CDK17
CDK2
CDK20
CDK4
CDK5
CDK5R1
CDK5RAP2
CDK6
CDK7
CDK9
CDKAL1
CDKL5
CDKN1A
CDKN1B
CDKN1C
CDKN2A
CDKN2B
CDKN2B-AS1
CDKN2C
CDKN2D
CDKN3
CDLS2
CDNF
CDO1
CDON
CDR1-AS
CDRT1
CDRT15
CDSN
CDT1
CDX1
CDX2
CDYL
CEACAM1
CEACAM3
CEACAM5
CEACAM6
CEACAM7
CEACAMP8
CEBPA
CEBPB
CEBPD
CEBPG
CEL
CELA1
CELA2A
CELA3B
CELF1
CELF2
CELF3
CELF4
CELSR1
CEMIP2
CENPA
CENPB
CENPE
CENPF
CENPJ
CENPU
CEP104
CEP126
CEP128
CEP131
CEP135
CEP152
CEP164
CEP170
CEP290
CEP41
CEP57
CEP63
CEP76
CER1
CERK
CERS1
CERS2
CERS3
CERS5
CERS6
CERT1
CES1
CES1P1
CES2
CETP
CFAP126
CFAP298
CFAP300
CFAP410
CFAP43
CFAP47
CFAP58
CFAP74
CFB
CFC1
CFC2
CFD
CFEOM3A
CFH
CFHR1
CFHR2
CFHR3
CFHR4
CFHR5
CFI
CFL1
CFLAR
CFP
CFTR
CGA
CGB3
CGB5
CGB7
CGGBP1
CGN
CH25H
CHADL
CHAMP1
CHAT
CHCHD10
CHCHD2
CHD1
CHD2
CHD3
CHD5
CHD6
CHD7
CHD9
CHEK1
CHEK2
CHGA
CHGB
CHI3L1
CHIT1
CHKA
CHKB
CHMP2B
CHMP3
CHMP5
CHN1
CHODL
CHPT1
CHRD
CHRDL1
CHRFAM7A
CHRM1
CHRM2
CHRM3
CHRNA1
CHRNA2
CHRNA4
CHRNA5
CHRNA6
CHRNA7
CHRNA9
CHRNB2
CHRNB3
CHRNE
CHRNG
CHST1
CHST11
CHST13
CHST14
CHST3
CHST6
CHSY1
CHTF8
CHUK
CIAPIN1
CIB1
CIC
CIDEA
CIDEC
CIITA
CILK1
CILP
CIRBP
CISD1
CISD2
CISD3
CISH
CIT
CIZ1
CKAP2
CKAP2L
CKAP4
CKAP5
CKB
CKBB
CKBE
CKM
CKMT1A
CKMT1B
CKMT2
CKS1B
CLASRP
CLCF1
CLCN1
CLCN2
CLCN3
CLCN4
CLCN5
CLCN6
CLCN7
CLCNKB
CLDN1
CLDN10
CLDN11
CLDN14
CLDN16
CLDN18
CLDN19
CLDN2
CLDN3
CLDN4
CLDN5
CLDN6
CLDN7
CLEC11A
CLEC12A
CLEC12B
CLEC16A
CLEC1B
CLEC2D
CLEC3B
CLEC4A
CLEC4C
CLEC4D
CLEC4E
CLEC4G
CLEC4M
CLEC5A
CLEC6A
CLEC7A
CLEC9A
CLIC5
CLIP1
CLIP2
CLK1
CLMP
CLN3
CLN5
CLN6
CLN8
CLOCK
CLP1
CLPX
CLSTN1
CLTC
CLTRN
CLU
CMA1
CMC2
CMD1X
CMIP
CMKLR1
CMT2G
CMT2H
CMTDIA
CMTX2
CMTX3
CMYA5
CNBP
CNDP1
CNKSR2
CNMD
CNN1
CNNM3
CNOT3
CNP
CNPY2
CNPY3
CNR1
CNR2
CNSN
CNTD1
CNTF
CNTFR
CNTN2
CNTNAP1
CNTNAP2
CNTNAP5
COA7
COASY
COBL
COCH
COG2
COG5
COG6
COG7
COG8
COL10A1
COL11A1
COL11A2
COL12A1
COL14A1
COL15A1
COL17A1
COL18A1
COL1A1
COL1A2
COL20A1
COL21A1
COL22A1
COL25A1
COL27A1
COL2A1
COL3A1
COL4A1
COL4A2
COL4A3
COL4A4
COL4A5
COL5A1
COL5A2
COL5A3
COL6A1
COL6A2
COL6A3
COL7A1
COL8A1
COL8A2
COL9A1
COL9A2
COL9A3
COLEC11
COLEC12
COLGALT1
COLQ
COMA
COMMD5
COMP
COMT
CONDBA
COP1
COPA
COPB2
COPG2IT1
COPS3
COPS5
COQ2
COQ7
COQ8B
CORIN
CORO1B
CORT
COX10
COX15
COX20
COX4I1
COX4I2
COX5A
COX5B
COX6A1
COX6B1
COX6C
COX7B
COX8A
COX8C
CP
CPA1
CPA3
CPA6
CPAT1
CPB2
CPE
CPEB1
CPLANE1
CPLX1
CPLX3
CPM
CPOX
CPQ
CPS1
CPSF6
CPSQ1
CPT1A
CPT1B
CPT1C
CPT2
CPVL
CPZ
CR1
CR2
CRABP1
CRABP2
CRADD
CRAT
CRB2
CRBN
CREB1
CREB3
CREB3L1
CREB3L2
CREB3L4
CREB5
CREBBP
CREBZF
CREG1
CRELD1
CREM
CRH
CRHBP
CRHR1
CRHR2
CRIP1
CRIP2
CRIPT
CRK
CRKL
CRLF1
CRLF2
CRLS1
CRNDE
CRNN
CRP
CRS6
CRSP6
CRSP77
CRTC1
CRYAA
CRYAB
CRYBB2
CRYGN
CRYGS
CRYZL1
CS
CSAD
CSCSC1
CSF1
CSF1R
CSF2
CSF2RA
CSF2RB
CSF3
CSF3R
CSGALNACT1
CSH1
CSH2
CSK
CSMD1
CSN1S1
CSN2
CSN3
CSNK1A1
CSNK1D
CSNK1E
CSNK2A1
CSNK2A2
CSNK2B
CSPG4
CSPP1
CSRNP3
CSRP1
CSRP2
CSRP3
CST3
CST5
CST6
CSTA
CSTB
CTAG1B
CTBP1
CTC1
CTCF
CTDP1
CTF1
CTH
CTHRC1
CTLA4
CTNNA1
CTNNA2
CTNNA3
CTNNB1
CTNNBIP1
CTNND1
CTNND2
CTNR
CTPS1
CTRC
CTRL
CTSA
CTSB
CTSC
CTSD
CTSE
CTSG
CTSH
CTSK
CTSL
CTSS
CTSV
CTTN
CTU1
CTU2
CUBN
CUEDC2
CUL1
CUL3
CUL4A
CUL4B
CUL5
CUX1
CUX2
CX3CL1
CX3CR1
CXADR
CXCL1
CXCL10
CXCL11
CXCL12
CXCL13
CXCL14
CXCL16
CXCL17
CXCL2
CXCL3
CXCL5
CXCL6
CXCL8
CXCL9
CXCR1
CXCR2
CXCR3
CXCR4
CXCR5
CXCR6
CXorf21
CXorf56
CXXC4
CXXC5
CYB561
CYB561D2
CYB5A
CYB5R3
CYBA
CYBB
CYBC1
CYC1
CYCS
CYFIP1
CYFIP2
CYGB
CYLC1
CYLD
CYP11A1
CYP11B2
CYP17A1
CYP19A1
CYP1A1
CYP1A2
CYP1B1
CYP20A1
CYP21A1P
CYP21A2
CYP24A1
CYP26A1
CYP26B1
CYP27A1
CYP27B1
CYP2A13
CYP2A6
CYP2B6
CYP2C19
CYP2C8
CYP2C9
CYP2D6
CYP2E1
CYP2F1
CYP2J2
CYP3A4
CYP3A5
CYP3A7
CYP46A1
CYP4A11
CYP4B1
CYP4F2
CYP4F22
CYP4F3
CYP7A1
CYP7B1
CYREN
CYSLTR1
CYSLTR2
CYTH2
CYTOR
DAB2
DACH1
DAD1
DAG
DAG1
DAGLA
DALRD3
DAND5
DAO
DAPK1
DARS1
DARS2
DAXX
DAZAP2
DBH
DBI
DBN1
DBP
DBT
DCAF1
DCAF17
DCAF8
DCBLD2
DCD
DCDC2
DCHS1
DCHS2
DCK
DCLK1
DCLK2
DCLK3
DCLRE1C
DCN
DCPS
DCT
DCTN1
DCTN2
DCTN6
DCX
DCXR
DDAH1
DDAH2
DDB1
DDB2
DDC
DDHD1
DDIT3
DDIT4
DDN
DDOST
DDR1
DDR2
DDT
DDX10
DDX11
DDX39B
DDX3X
DDX41
DDX5
DDX58
DDX6
DEAF1
DEFA1
DEFA3
DEFA4
DEFB1
DEFB118
DEFB127
DEFB4A
DEL19P13.13
DEL1P36
DELTA1
DENND2C
DENND5A
DENND6A
DENR
DEPDC5
DEPTOR
DERL1
DERL2
DERL3
DERPC
DES
DESMD
DFFA
DFFB
DFNB44
DGAT1
DGAT2
DGCR11
DGCR2
DGKA
DGKB
DGKE
DGKH
DGKI
DGKQ
DGKZ
DGUOK
DHCR24
DHCR7
DHFR
DHODH
DHPS
DHRS9
DHTKD1
DHX30
DHX37
DIABLO
DIAPH1
DICER1
DIO2
DIO3
DIP2A
DIPK2A
DIS3
DISP1
DKC1
DKK1
DKK3
DKK4
DLAT
DLC1
DLD
DLG1
DLG2
DLG3
DLG4
DLGAP1
DLGAP2
DLGAP3
DLK1
DLL1
DLST
DLX1
DLX4
DLX5
DLX6
DMAP1
DMBT1
DMD
DMPK
DMTN
DNA2
DNAAF1
DNAAF2
DNAAF3
DNAAF4
DNAAF4-CCPG1
DNAAF5
DNAAF6
DNAH1
DNAH10
DNAH11
DNAH5
DNAH8
DNAH9
DNAI1
DNAI2
DNAJB1
DNAJB13
DNAJB2
DNAJB4
DNAJC12
DNAJC13
DNAJC15
DNAJC19
DNAJC21
DNAJC3
DNAJC7
DNAL1
DNASE1
DNASE1L3
DNASE2
DNCI2
DNM1
DNM1L
DNM2
DNM3
DNMBP
DNMT1
DNMT3A
DNMT3B
DNMT3L
DNTT
DOCK1
DOCK2
DOCK3
DOCK4
DOCK8
DOCK9
DOK7
DONSON
DPAGT1
DPEP1
DPF2
DPH1
DPH6-DT
DPP4
DPP6
DPP8
DPP9
DPT
DPYD
DPYS
[truncated: 6,232 more rows]
